# Supplementary material for: Crystallographic and spectroscopic studies on persistent triarylpropargyl cations
Source: Royal Society of Chemistry journal article supplement (doi:10.1039/d4cc01786b), 2024-01-01
Supplement: d4cc01786b1.pdf [file d4cc01786b1.pdf]

Electronic Supplementary Material (ESI) for Chemical Communications.  
This journal is © The Royal Society of Chemistry 2024

## Electronic Supplementary Information for

# Crystallographic and spectroscopic studies on persistent triarylpropargyl cations

Takuya Shimajiri,<sup>\*a,b</sup> Taiga Tsue,<sup>a</sup> Shumpei Koakutsu,<sup>a</sup> Yusuke Ishigaki,<sup>a</sup> Takanori Suzuki<sup>\*a</sup>

<sup>a</sup>*Department of Chemistry, Faculty of Science, Hokkaido University, Sapporo 060-0810, Japan.*

<sup>b</sup>*Creative Research Institution, Hokkaido University, Sapporo, Hokkaido 001-0021, Japan*

<sup>c</sup>*Present address: Department of Applied Chemistry, Graduate School of Engineering, Kyushu University, 819-0395, Japan*

E-mail: t.shimajiri@sci.hokudai.ac.jp, tak@sci.hokudai.ac.jp

## Table of contents

|                                                                                  |    |
|----------------------------------------------------------------------------------|----|
| <b>1. General</b> .....                                                          | 2  |
| <b>2. Experimental Section</b> .....                                             | 3  |
| 2.1 Synthetic procedures .....                                                   | 3  |
| 2.2 NMR spectra of new compounds.....                                            | 7  |
| 2.3 FD-MS spectra of new compounds .....                                         | 13 |
| 2.4 X-ray analyses.....                                                          | 19 |
| 2.5 X-ray structures.....                                                        | 21 |
| 2.6 Crystal packings .....                                                       | 23 |
| 2.7 Optical measurements .....                                                   | 28 |
| <b>3. Theoretical Studies</b> .....                                              | 29 |
| 3.1 TD-DFT .....                                                                 | 29 |
| 3.2 Optimized structures .....                                                   | 40 |
| 3.3 Cartesian coordinates of optimized structures of <b>1</b> <sup>+</sup> ..... | 41 |
| 3.4 Cartesian coordinates of optimized structures of <b>2</b> <sup>+</sup> ..... | 43 |
| <b>4. References</b> .....                                                       | 45 |

## 1. General

All reactions were carried out under an argon atmosphere. All commercially available compounds were used without further purification. Dry acetonitrile was obtained by distillation from  $\text{CaH}_2$  and  $\text{P}_2\text{O}_5$  prior to use. Column chromatography was performed on silica gel 60N (KANTO KAGAKU, spherical neutral) of particle size 40–50  $\mu\text{m}$  or Wakogel<sup>®</sup> 60N (neutral) of particle size 38-100  $\mu\text{m}$ .  $^1\text{H}$  and  $^{13}\text{C}$  NMR spectra were recorded on a BRUKER Ascend<sup>™</sup> 400 ( $^1\text{H}/400$  MHz and  $^{13}\text{C}/100$  MHz) spectrometer. IR spectra were measured on a Shimadzu IRAffinity-1S spectrophotometer using the attenuated total reflection (ATR) mode. Mass spectra were recorded on a JEOL JMS-T100GCV spectrometer in FD mode (GC-MS&NMR Laboratory, Research Faculty of Agriculture, Hokkaido University). Melting points were measured on a Stanford Research Systems MPA100 Optimelt and are uncorrected. UV-Vis spectra in solution state were recorded on a JASCO V-770 spectrophotometer. UV-Vis spectra in a solid state were recorded on a JASCO MSV 5200 spectrophotometer (Transmittance Mode). DFT calculations were performed with the Gaussian 16W program package<sup>[1]</sup>. All calculations were performed at B3LYP-D3/6-31G\*\* level of theory.

## 2. Experimental Section

### 2.1 Synthetic procedures

**Scheme S1.** Synthetic route for propargyl cations  $1^+X^-$ ,  $2^+X^-$

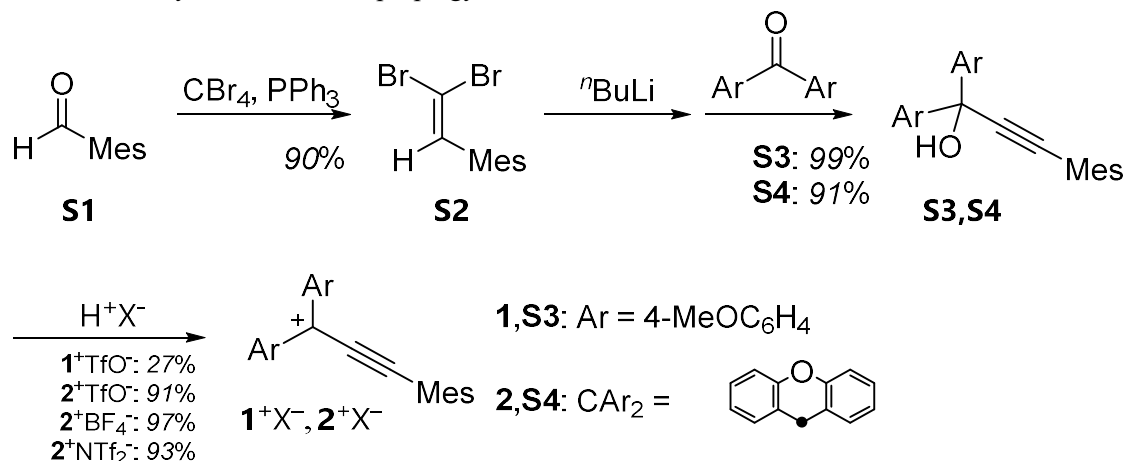

#### 3-mesityl-1,1-bis(4-methoxyphenyl)prop-2-yn-1-ol **S3**

To a solution of **S2** (3.04 g, 10.0 mmol) prepared from **S1** according to the reported method<sup>[2]</sup> in dry THF (50 mL) was added  $n\text{BuLi}$  (1.52 M in hexane, 14.0 mL, 21.3 mmol) dropwise over 5 min at  $-78^\circ\text{C}$ . After stirring at  $-78^\circ\text{C}$  for 30 min, 4,4'-dimethoxybenzophenone (2.42 g, 10.0 mmol) was added to the reaction mixture at  $-78^\circ\text{C}$ . The mixture was warmed to  $26^\circ\text{C}$  and stirred at  $26^\circ\text{C}$  for 2 h. Then, the mixture was

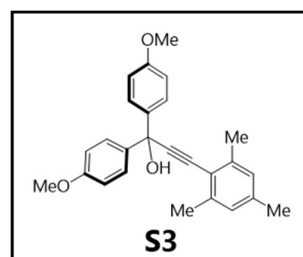

diluted with water (20 mL). The whole mixture was extracted with EtOAc (30 mL) three times. The combined organic layers were washed with water and brine, and dried over anhydrous  $\text{MgSO}_4$ . After filtration, the solvent was concentrated under reduced pressure. The crude product was purified by column chromatography on silica gel (EtOAc:hexane = 1:19,  $R_f$  = 0.38) to give **S3** (3.84 g, 9.93 mmol, 99% yield) as a viscous golden yellow oil.

**S3**;  $^1\text{H NMR}$  (400 MHz,  $\text{CDCl}_3$ ):  $\delta$ /ppm 7.59 (4H, d,  $J$  = 8.8 Hz), 6.86 (2H, s), 6.86 (4H, d,  $J$  = 8.8 Hz), 3.80 (6H, s), 2.76 (1H, s), 2.39 (6H, s), 2.28 (3H, s);  $^{13}\text{C NMR}$  (100 MHz,  $\text{CDCl}_3$ ):  $\delta$ /ppm 159.02, 140.45, 138.04, 137.91, 127.63, 127.46, 119.30, 113.49, 99.87, 85.02, 74.64, 55.29, 21.29, 21.11; IR (ATR):  $\nu/\text{cm}^{-1}$  3454, 2951, 2943, 2914, 2835, 2365, 2217, 1608, 1584, 1506, 1462, 1441, 1416, 1374, 1300, 1244, 1171, 1115, 1033, 988, 935, 901, 854, 828, 783, 750, 729, 636, 619, 587, 548; LR-MS (FD)  $m/z$  (%): 388.24 (5), 387.24 (30), 386.23 ( $\text{M}^+$ , bp); HR-MS (FD) Calcd. for  $\text{C}_{26}\text{H}_{26}\text{O}_3$ : 386.18819; Found: 386.18920.

### 9-(mesitylethynyl)-9H-xanthen-9-ol S4

To a solution of **S2** (10.0 g, 32.9 mmol) prepared from **S1** according to the reported method<sup>[2]</sup> in dry THF (150 mL) was added <sup>n</sup>BuLi (1.51 M in hexane, 43.5 mL, 65.8 mmol) dropwise over 15 min at -78 °C. After stirring at -78 °C for 30 min, xanthone (5.87 g, 29.9 mmol) was added to the reaction mixture at -78 °C. The mixture was warmed to

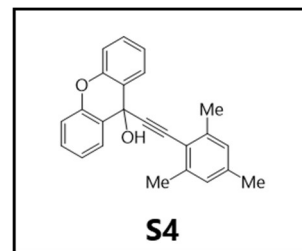

26 °C and stirred at 26 °C for 29 h. Then, the mixture was diluted with water (50 mL). The whole mixture was extracted with EtOAc (30 mL) three times. The combined organic layers were washed with water and brine and dried over anhydrous MgSO<sub>4</sub>. After filtration, the solvent was concentrated under reduced pressure. The crude product was purified by washing with hexane (100 mL) to give **S4** (9.21 g, 27.1 mmol, 91% yield) as a white solid.

**S4**; Mp: 117.3-117.9°C; <sup>1</sup>H NMR (400 MHz, CDCl<sub>3</sub>): δ/ppm 8.08 (2H, dd, *J*= 0.8 Hz, 8.0 Hz), 7.40 (2H, ddd, *J*= 0.8 Hz, 7.8 Hz, 7.9 Hz), 7.20-7.26 (4H, m), 6.86 (2H, s), 2.73 (1H, s), 2.41 (6H, s), 2.28 (3H, s); <sup>13</sup>C NMR (100 MHz, CDCl<sub>3</sub>): δ/ppm 149.63, 140.54, 138.30, 129.93, 128.73, 127.67, 124.20, 123.59, 119.00, 116.85, 98.25, 85.78, 64.98, 21.32, 21.09; IR (ATR): ν/cm<sup>-1</sup> 3486, 3048, 2914, 2854, 2729, 2228, 1952, 1910, 1768, 1742, 1622, 1605, 1576, 1490, 1480, 1458, 1447, 1378, 1366, 1319, 1293, 1236, 1205, 1151, 1127, 1101, 1034, 1016, 965, 939, 926, 906, 873, 866, 826, 763, 753, 744, 729, 722, 675, 631, 592, 576, 542, 501; LR-MS (FD) *m/z* (%): 342.15 (4), 341.15 (26), 340.14 (M<sup>+</sup>, bp); HR-MS (FD) Calcd. for C<sub>24</sub>H<sub>20</sub>O<sub>2</sub>: 340.14633; Found: 340.14513.

### 3-mesityl-1,1-bis(4-methoxyphenyl) prop-2-yn-1-ylum triflate 1<sup>+</sup>TfO<sup>-</sup>

To a solution of **S3** (200 mg, 517 μmol) in dry CH<sub>2</sub>Cl<sub>2</sub> (1.0 mL) was added TfOH (140 μL, 1.55 mmol) at -40 °C, and the mixture was stirred at -40 °C for 20 min. The addition of dry diethyl ether led to precipitation of the cation salt at -40°C. The precipitates were collected, washed with dry diethyl ether (20 mL) three times, and dried in vacuo to give **1<sup>+</sup>TfO<sup>-</sup>** (71.8 mg, 138 μmol, 27% yield) as a red solid.

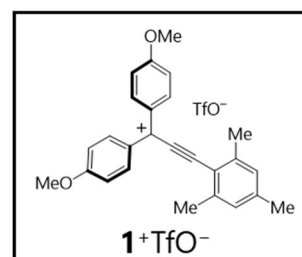

**1<sup>+</sup>TfO<sup>-</sup>**; Mp: 96.9-114.5 °C (decomp.); <sup>1</sup>H NMR (400 MHz, CDCl<sub>3</sub>): δ/ppm 8.16 (4H, d, *J*= 9.2 Hz), 7.35 (4H, d, *J*= 9.2 Hz), 7.09 (2H, s), 4.15 (6H, s), 2.59 (6H, s), 2.42 (3H, s); <sup>13</sup>C NMR (100 MHz, CDCl<sub>3</sub> with 2.6% w/v TFAA): δ/ppm 171.67, 171.64, 147.95, 146.36, 141.14, 138.04, 132.26, 129.46, 117.97, 117.49, 106.90, 57.30, 22.13, 21.44; IR (ATR): ν/cm<sup>-1</sup> 3097, 3007, 2955, 2850, 2735, 2642, 2605, 2321, 2130, 2115, 1594, 1577, 1513, 1464, 1451, 1440, 1378, 1352, 1318, 1276, 1225, 1179, 1154, 1131, 1063, 1029, 914, 827, 807, 785, 755, 722, 664, 635, 610, 602, 579, 553, 547, 512; LR-MS (FD) *m/z* (%): 386.17 (13), 370.18 (29), 369.17 (M<sup>+</sup>, bp); HR-MS (FD) Calcd. for C<sub>26</sub>H<sub>25</sub>O<sub>2</sub>: 369.18511; Found: 369.18545.

9-(mesitylethynyl)-9H-xanthen-9-ylum triflate  $2^+TfO^-$

To a solution of **S4** (3.00 g, 8.81 mmol) in dry  $CH_2Cl_2$  (15.0 mL) was added TfOH (857  $\mu$ L, 9.69 mmol) at 0 °C, and the mixture was stirred at 0 °C for 5 min. The addition of dry diethyl ether led to precipitation of the cation salt at 0°C. The precipitates were collected, washed with dry diethyl ether (100 mL) three times, and dried in vacuo to give  $2^+TfO^-$  (4.03 g, 8.53 mmol, 91% yield) as a red solid.

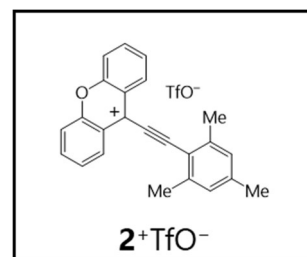

$2^+TfO^-$ ; Mp: 145.9-146.7 °C (decomp.);  $^1H$  NMR (400 MHz,  $CDCl_3$ ):  $\delta$ /ppm 8.82 (2H, dd,  $J$ = 1.2 Hz, 8.4 Hz), 8.54 (2H, ddd,  $J$ = 1.6 Hz, 7.0 Hz, 8.7 Hz), 8.27 (2H, dd,  $J$ = 1.2 Hz, 8.8 Hz), 8.09 (2H, ddd,  $J$ = 1.2 Hz, 7.2 Hz, 8.3 Hz), 7.22 (2H, s), 2.82 (6H, s), 2.45 (3H, s);  $^{13}C$  NMR (100 MHz,  $CDCl_3$ ):  $\delta$ /ppm 157.96, 154.83, 148.13, 146.49, 144.02, 132.15, 130.76, 130.05, 129.88, 124.74, 120.39, 97.75, 21.83; IR (ATR):  $\nu/cm^{-1}$  3087, 2982, 2313, 2229, 2131, 1616, 1594, 1577, 1544, 1493, 1473, 1436, 1392, 1369, 1291, 1268, 1235, 1223, 1173, 1136, 1065, 1031, 1010, 954, 913, 881, 868, 835, 789, 773, 749, 727, 668, 635, 627, 617; LR-MS (FD)  $m/z$  (%): 324.15 (27), 323.15 ( $M^+$ , bp); HR-MS (FD) Calcd. for  $C_{24}H_{19}O$ : 323.14359; Found: 323.14504.

9-(mesitylethynyl)-9H-xanthen-9-ylum tetrafluoroborate  $2^+BF_4^-$

To a solution of **S4** (300 mg, 881  $\mu$ mol) in dry  $CH_2Cl_2$  (3.00 mL) was added  $HBF_4 \cdot Et_2O$  (157 mg, 969  $\mu$ mol) at 0 °C, and the mixture was stirred at 0 °C for 5 min. The addition of dry diethyl ether led to precipitation of the cation salt at 0°C. The precipitates were collected, washed with dry diethyl ether (30 mL) three times, and dried in vacuo to give  $2^+BF_4^-$  (352 mg, 858  $\mu$ mol, 97% yield) as a red solid.

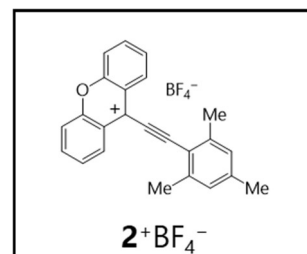

$2^+BF_4^-$ ; Mp: 231.2-232.0 °C (decomp.);  $^1H$  NMR (400 MHz,  $CDCl_3$ ):  $\delta$ /ppm 8.83 (2H, dd,  $J$ = 1.2 Hz, 8.3 Hz), 8.53 (2H, ddd,  $J$ = 1.6 Hz, 7.8 Hz, 8.0 Hz), 8.30 (2H, dd,  $J$ = 0.8 Hz, 8.8 Hz), 8.10 (2H, ddd,  $J$ = 1.2 Hz, 7.2 Hz, 8.4 Hz), 7.20 (2H, s), 2.81 (6H, s), 2.44 (3H, s);  $^{13}C$  NMR (100 MHz,  $CD_3CN$  with 4.6% w/v TFAA):  $\delta$ /ppm 157.92, 154.70, 148.20, 146.52, 144.07, 132.14, 130.72, 130.10, 129.89, 124.69, 120.42, 21.87; IR (ATR):  $\nu/cm^{-1}$  3096, 2360, 2332, 2226, 2138, 1618, 1594, 1577, 1545, 1494, 1474, 1436, 1392, 1369, 1294, 1244, 1236, 1210, 1175, 1165, 1122, 1092, 1050, 1034, 1020, 1011, 956, 881, 835, 788, 747, 727, 668, 643, 628, 617; LR-MS (FD)  $m/z$  (%): 324.11 (28), 323.11 ( $M^+$ , bp); HR-MS (FD) Calcd. for  $C_{24}H_{19}O$ : 323.14359; Found: 323.14340.

9-(mesitylethynyl)-9*H*-xanthen-9-ylum bis(trifluoromethanesulfonyl)imide **2**<sup>+</sup>NTf<sub>2</sub><sup>-</sup>

To a solution of **S4** (300 mg, 881 μmol) in dry CH<sub>2</sub>Cl<sub>2</sub> (3.00 mL) was added HNTf<sub>2</sub> (273 mg, 969 μmol) at 0 °C, and the mixture was stirred at 0 °C for 5 min. The addition of dry diethyl ether led to precipitation of the cation salt at 0°C. The precipitates were collected, washed with dry diethyl ether (50 mL) three times, and dried in vacuo to give **2**<sup>+</sup>NTf<sub>2</sub><sup>-</sup> (493 mg, 818 μmol, 93% yield) as a red solid.

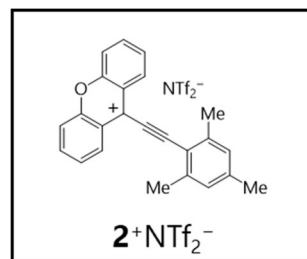

**2**<sup>+</sup>NTf<sub>2</sub><sup>-</sup>; Mp: 193.6-195.8 °C (decomp.); <sup>1</sup>H NMR (400 MHz, CDCl<sub>3</sub>): δ/ppm 8.82 (2H, br-d, *J*= 8.0 Hz), 8.53 (2H, br-t, *J*= 7.2 Hz), 8.27 (2H, br-d, *J*= 8.8 Hz), 8.09 (2H, ddd, *J*= 0.8 Hz, 7.2 Hz), 7.21 (2H, s), 2.82 (6H, s), 2.45 (3H, s); <sup>13</sup>C NMR (100 MHz, CDCl<sub>3</sub>): δ/ppm 157.86, 154.59, 148.17, 146.48, 144.04, 132.09, 130.67, 130.07, 129.86, 124.63, 120.39, 97.81, 21.06; IR (ATR): ν/cm<sup>-1</sup> 3082, 2315, 2150, 1615, 1594, 1578, 1542, 1494, 1472, 1436, 1395, 1370, 1350, 1333, 1294, 1240, 1200, 1175, 1160, 1136, 1053, 1038, 935, 895, 880, 861, 834, 792, 757, 743, 725, 667, 644, 610; LR-MS (FD) *m/z* (%): 324.14 (27), 323.14 (M<sup>+</sup>, bp); HR-MS (FD) Calcd. for C<sub>24</sub>H<sub>19</sub>O: 323.14359; Found: 323.14344.

## 2.2 NMR spectra of new compounds

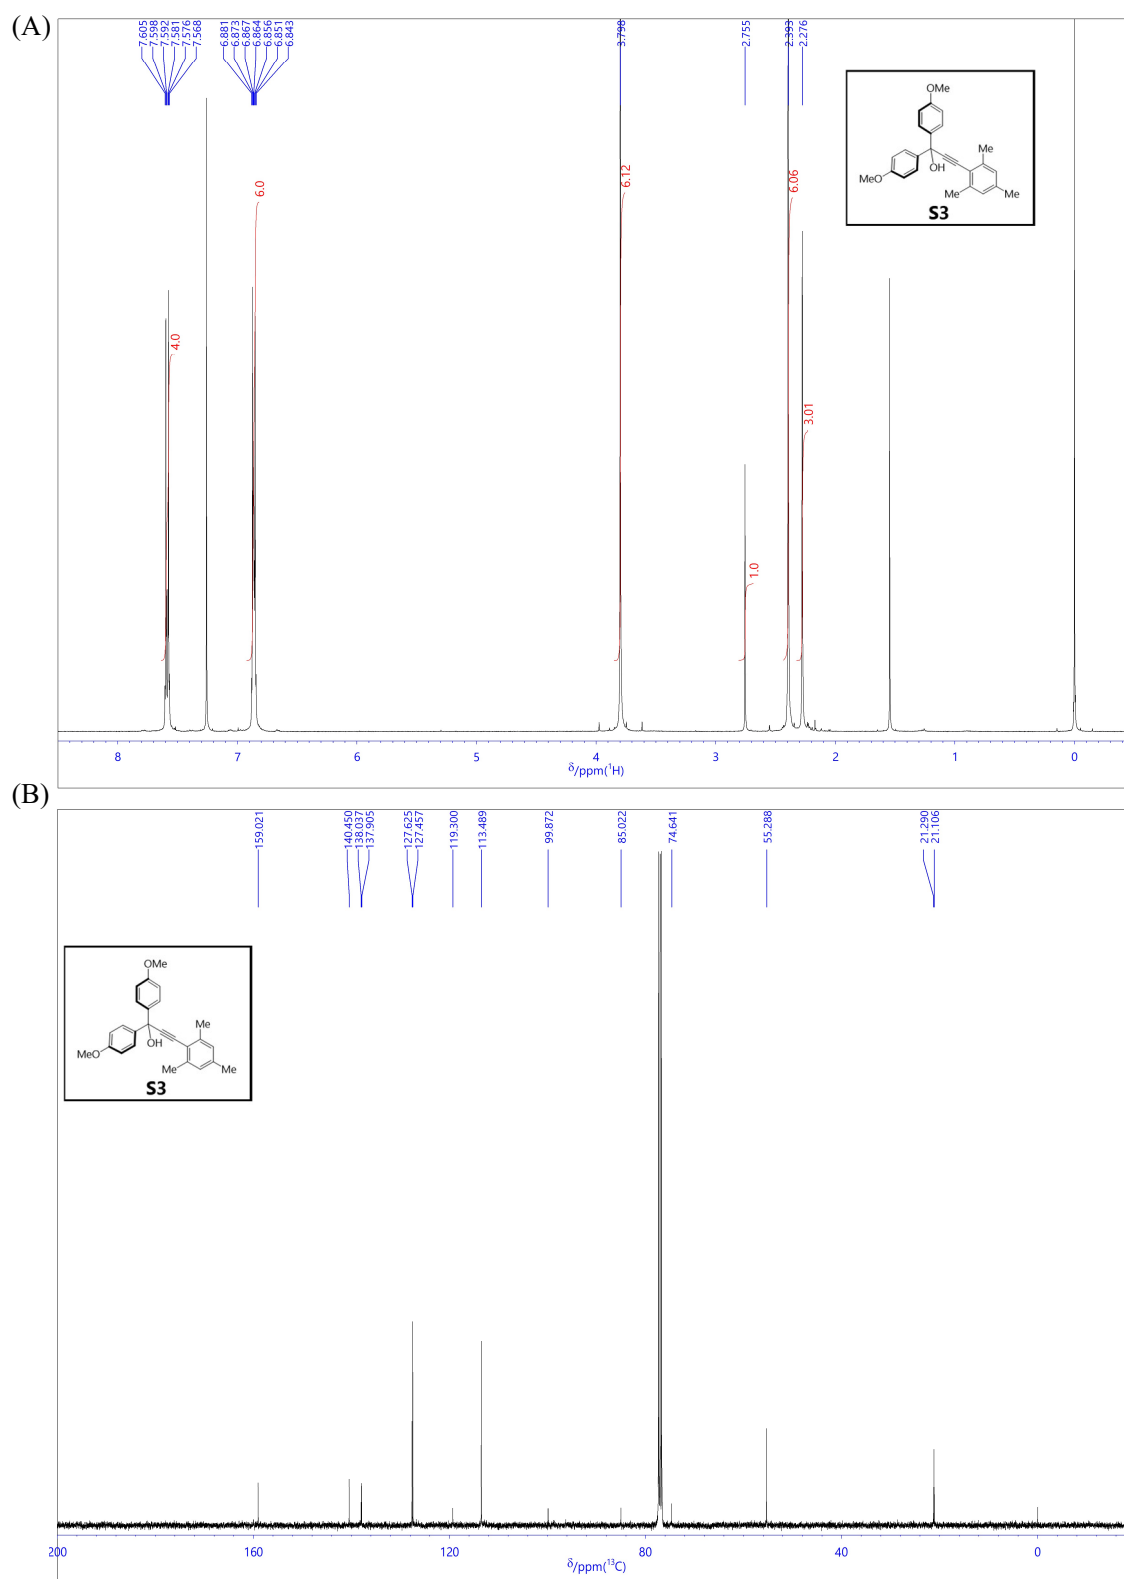

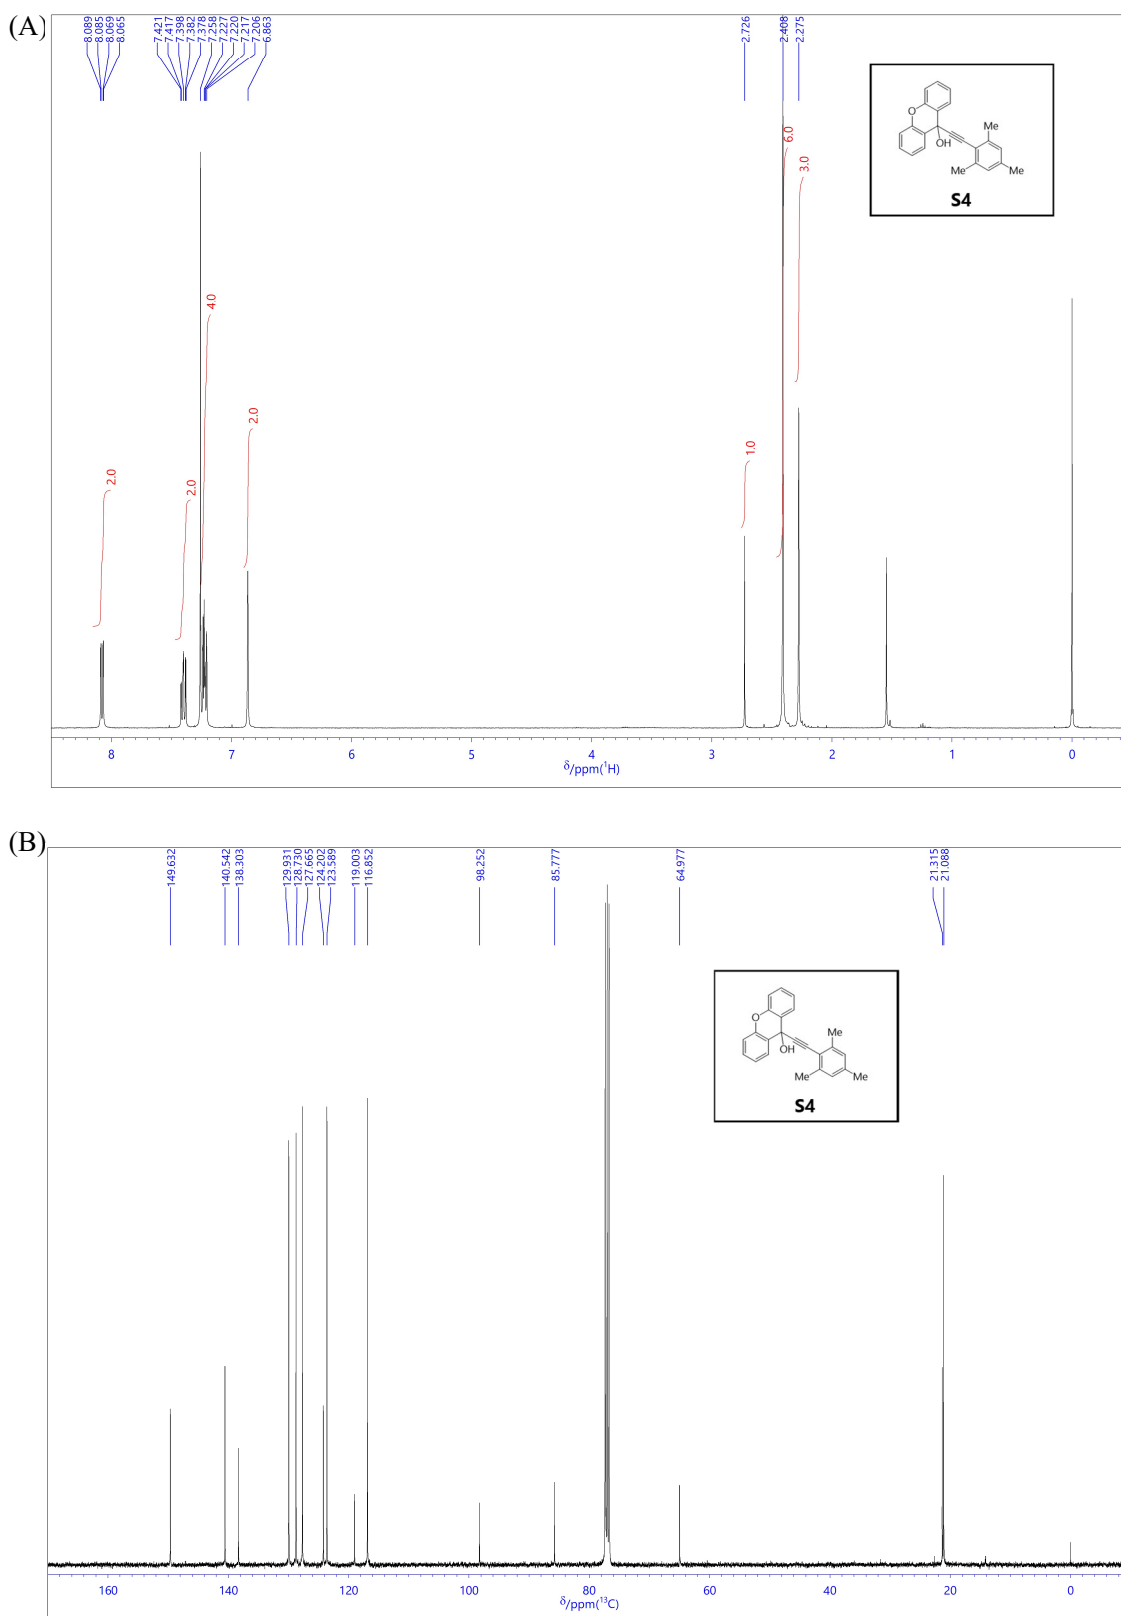

Figure S2. (A)  $^1\text{H}$  NMR and (B)  $^{13}\text{C}$  NMR spectra of **S4** in  $\text{CDCl}_3$ .



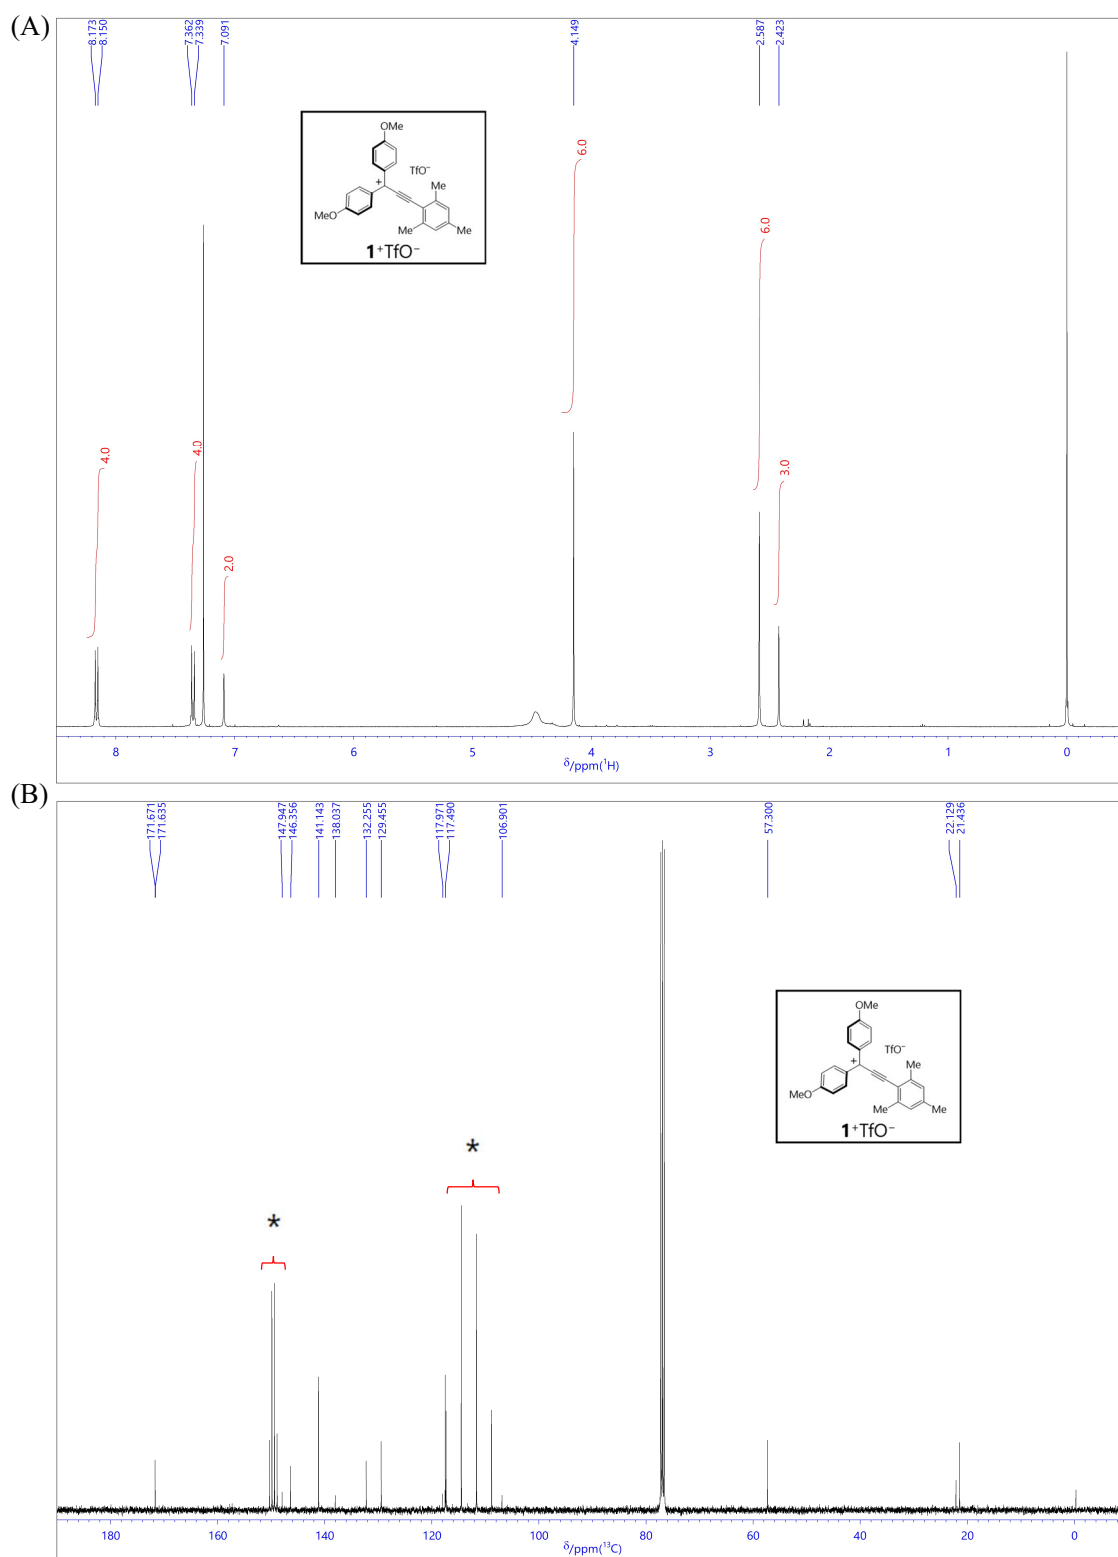

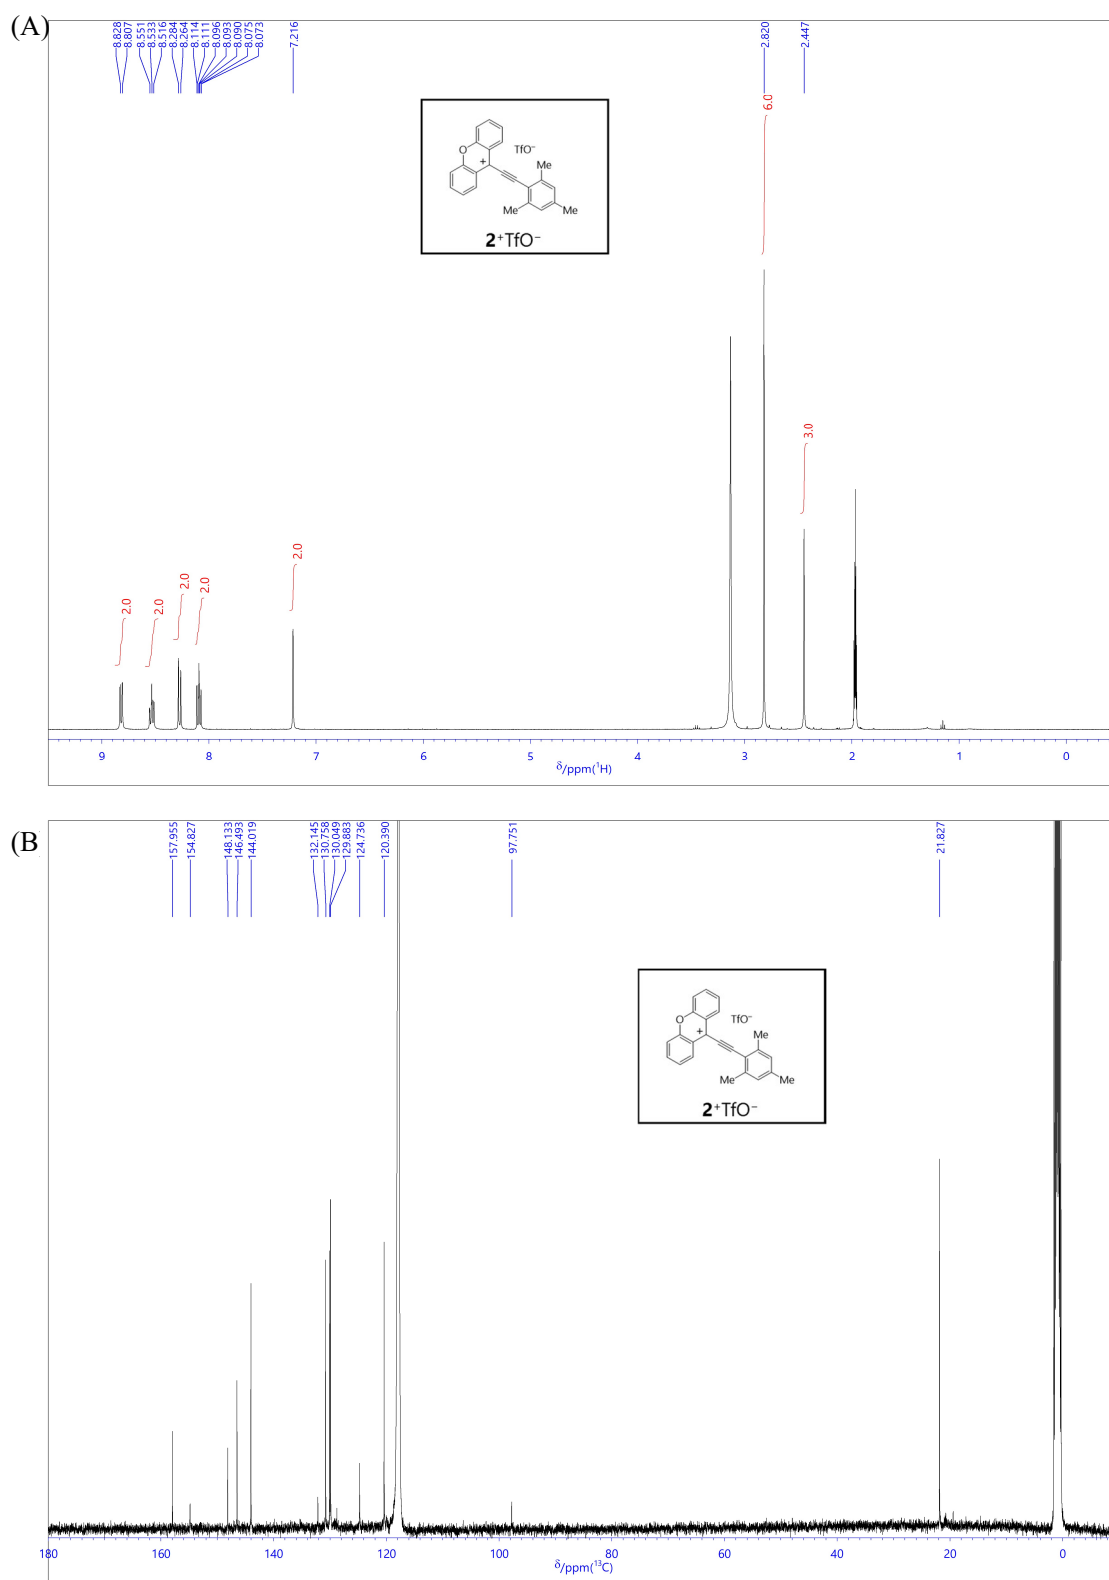

Figure S4. (A)  $^1H$  NMR and (B)  $^{13}C$  NMR spectra of  $2^+TfO^-$  in  $CD_3CN$ .

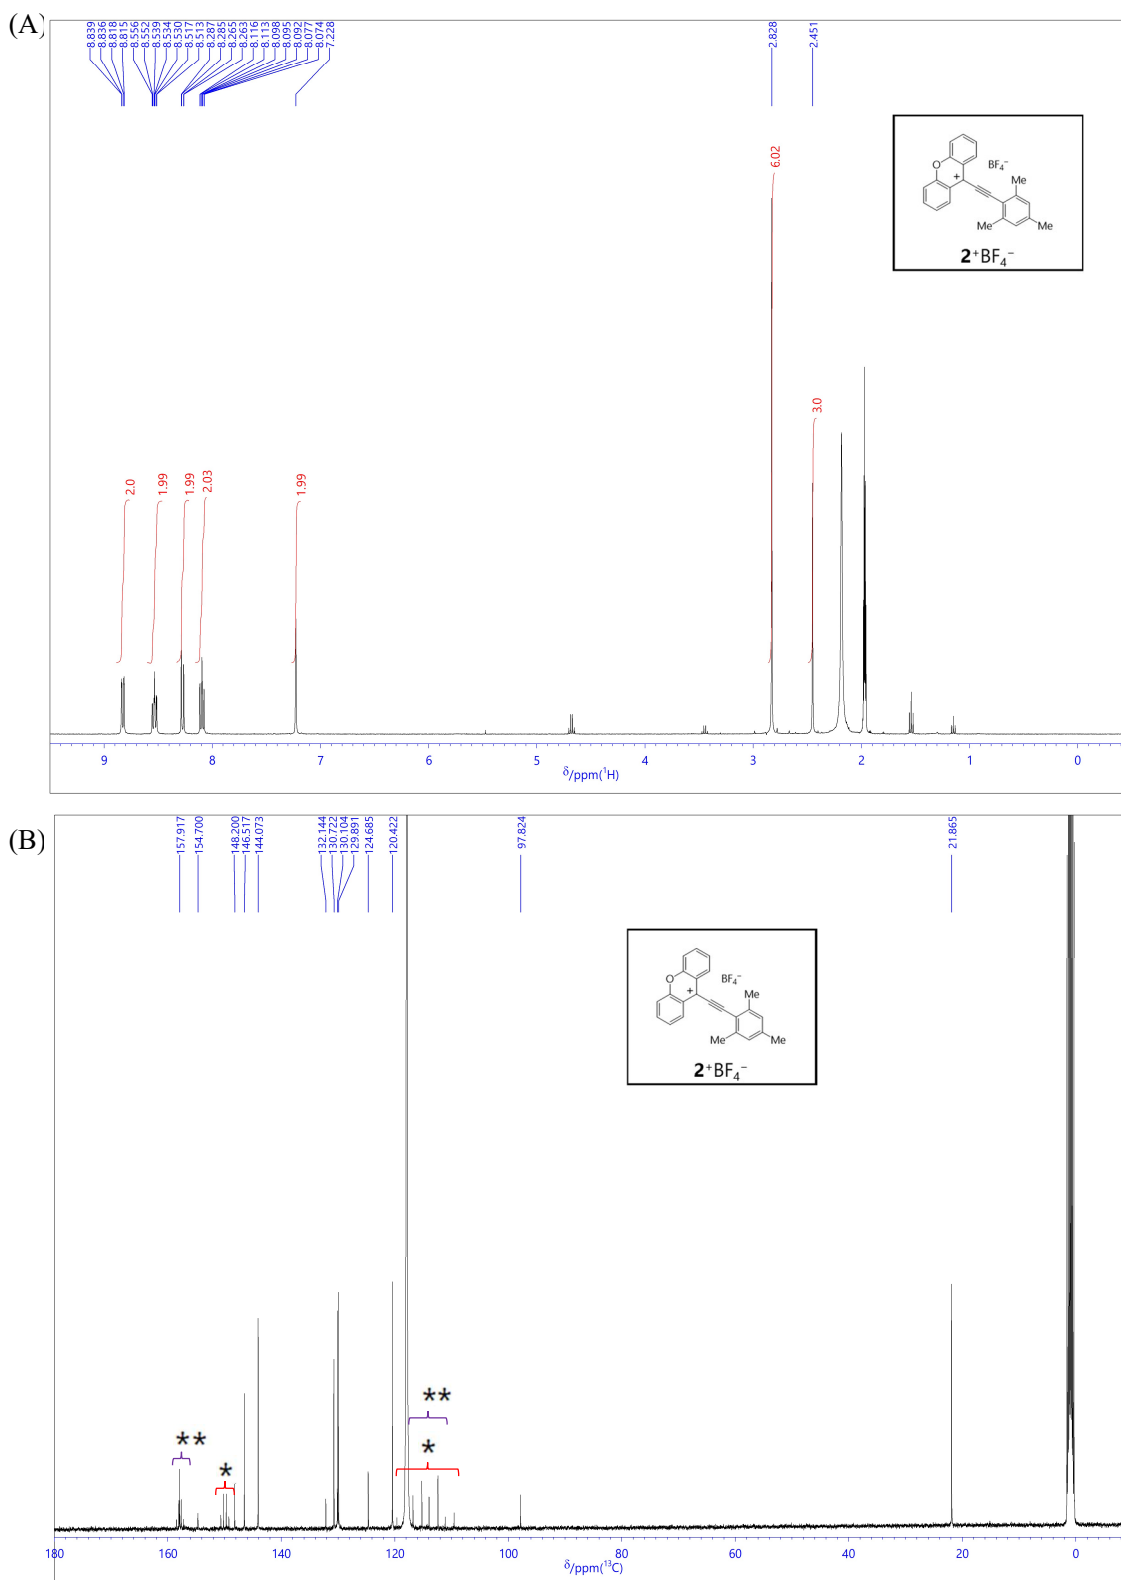

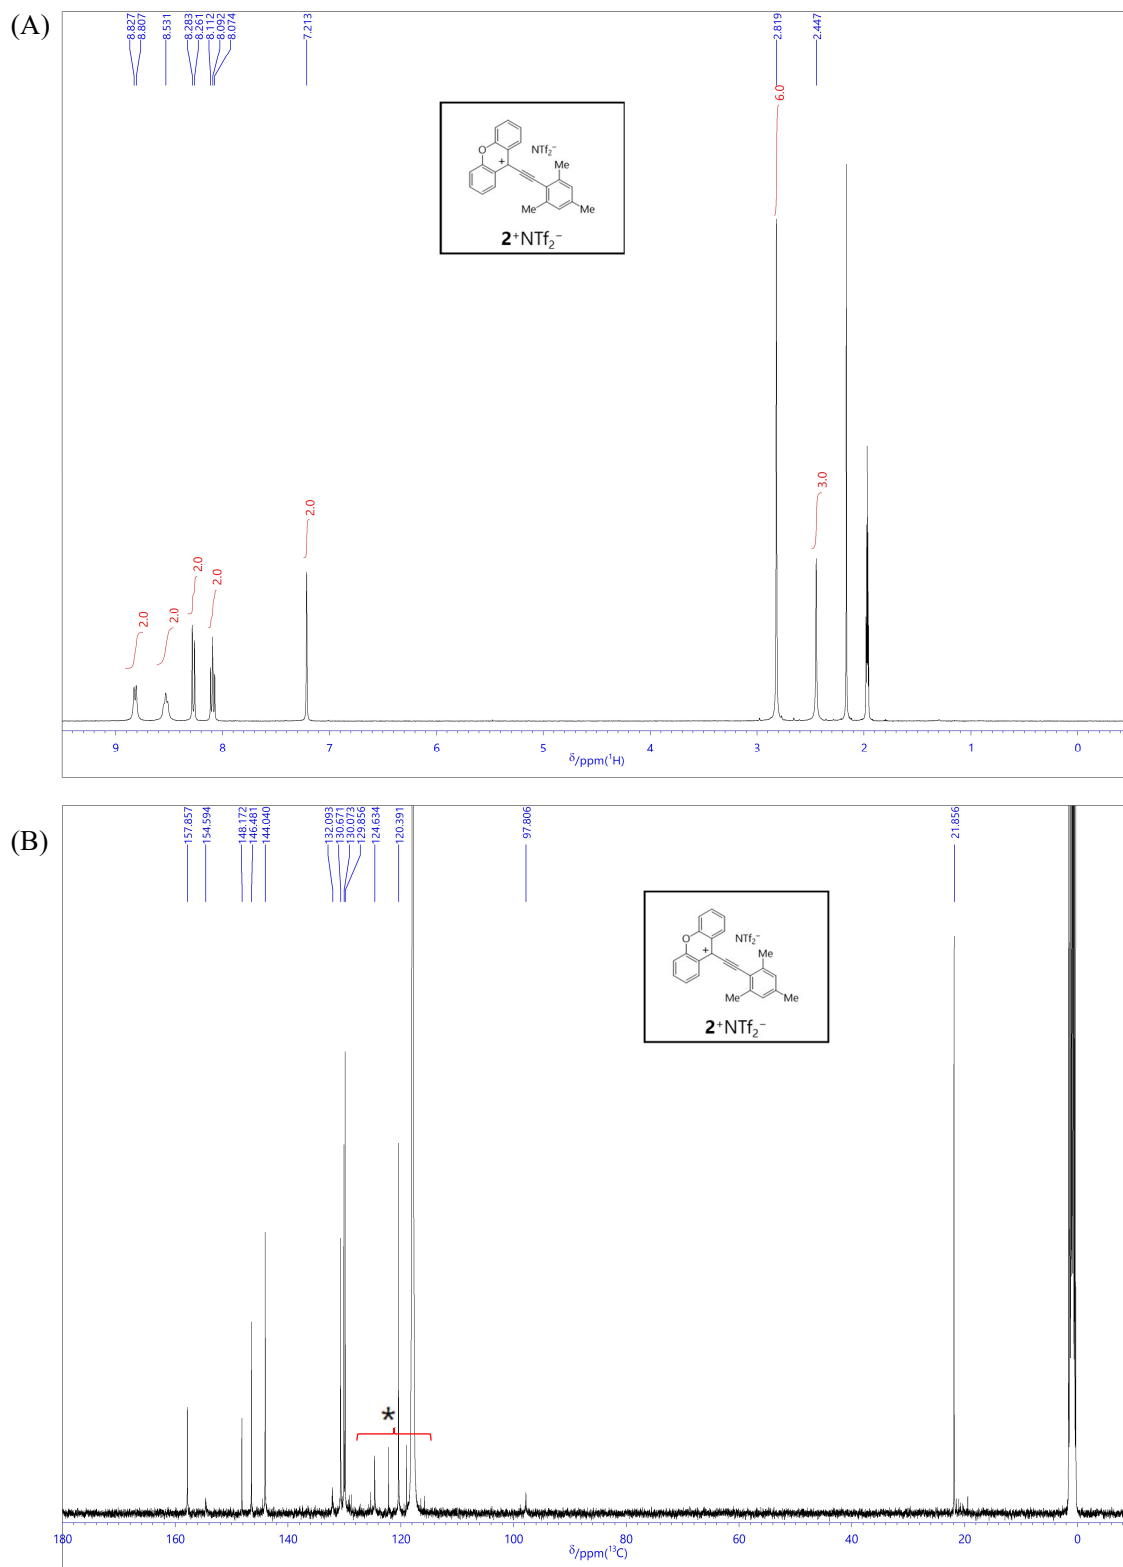

### 2.3 FD-MS spectra of new compounds

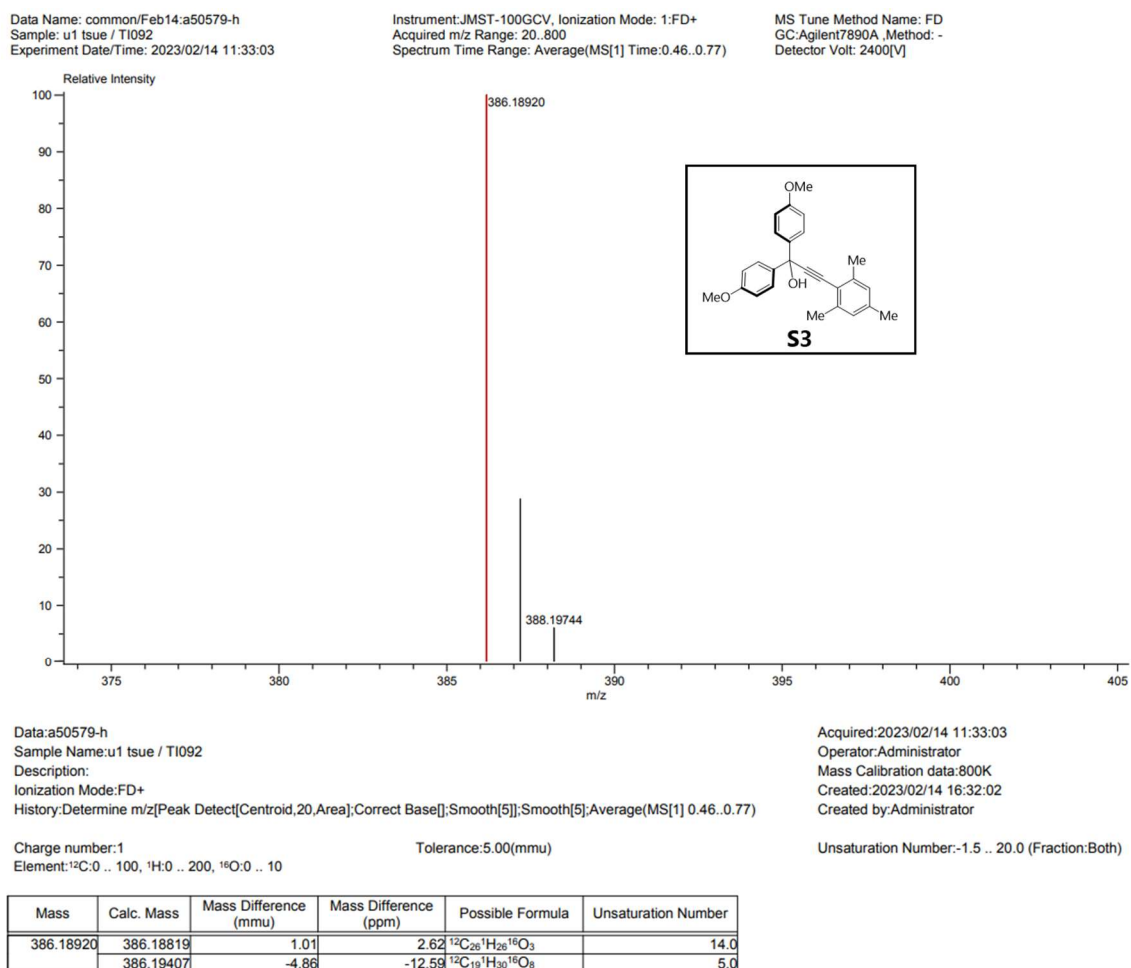

**Figure S7.** A HR-MS spectrum of **S3**.

Data Name: common/Feb27:a60209-  
Sample: u1 koakutsu / T1180-MS  
Experiment Date/Time: 2024/02/27 10:57:55

Instrument:JMST-100GCV, Ionization Mode: 1:FD+  
Acquired m/z Range: 20..800  
Spectrum Time Range: Average(MS[1] Time:0.61)

MS Tune Method Name: FD  
GC:Agilent7890A ,Method: -  
Detector Volt: 2300[V]

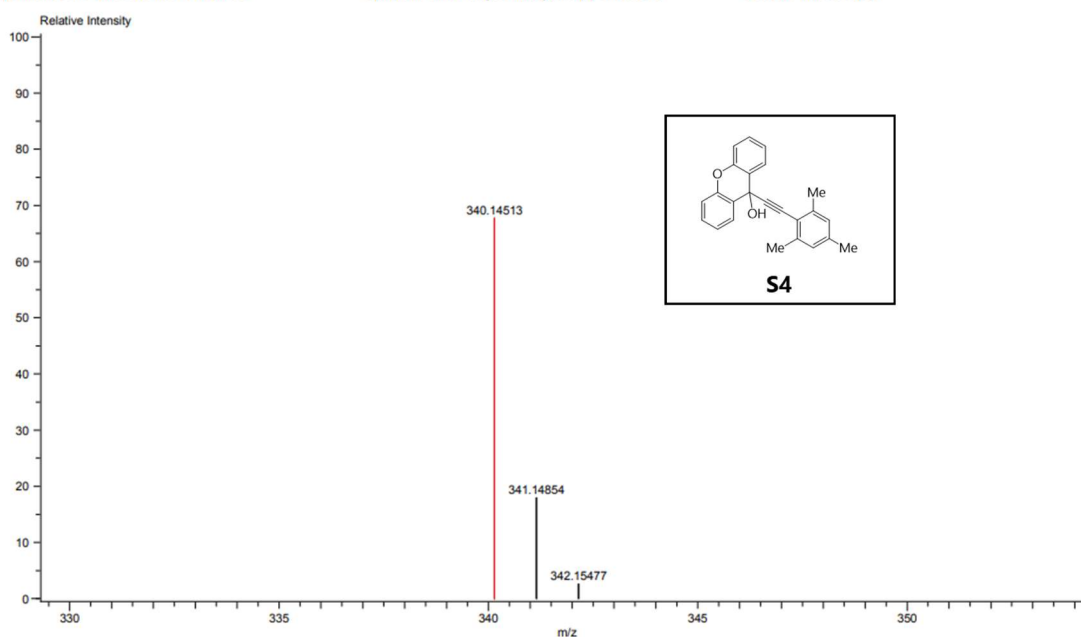

Data:a60209-  
Sample Name:u1 koakutsu / T1180-MS  
Description:  
Ionization Mode:FD+  
History:Determine m/z[Peak Detect[Centroid,10,Area];Correct Base[];Smooth[5]];Smooth[5];Average(MS[1] 0.61)

Acquired:2024/02/27 10:57:55  
Operator:Administrator  
Mass Calibration data:800P6  
Created:2024/02/27 11:01:51  
Created by:Administrator

Charge number:1  
Element:<sup>12</sup>C:0 .. 100, <sup>1</sup>H:0 .. 200, <sup>16</sup>O:0 .. 10

Tolerance:5.00(mmu)

Unsaturation Number:-1.5 .. 20.0 (Fraction:Both)

| Mass      | Calc. Mass | Mass Difference (mmu) | Mass Difference (ppm) | Possible Formula                                                                        | Unsaturation Number |
|-----------|------------|-----------------------|-----------------------|-----------------------------------------------------------------------------------------|---------------------|
| 340.14513 | 340.14633  | -1.20                 | -3.52                 | <sup>12</sup> C <sub>24</sub> <sup>1</sup> H <sub>20</sub> <sup>16</sup> O <sub>2</sub> | 15.0                |

Figure S8. A HR-MS spectrum of S4.

Data Name: common/Apr13:a51008-3  
 Sample: u1 tsue / T1100  
 Experiment Date/Time: 2023/04/13 17:27:00

Instrument:JMST-100GCV, Ionization Mode: 1:FD+  
 Acquired m/z Range: 20..800  
 Spectrum Time Range: Average(MS[1] Time:1.74)

MS Tune Method Name: FD  
 GC:Agilent7890A, Method:-  
 Detector Volt: 2400[V]

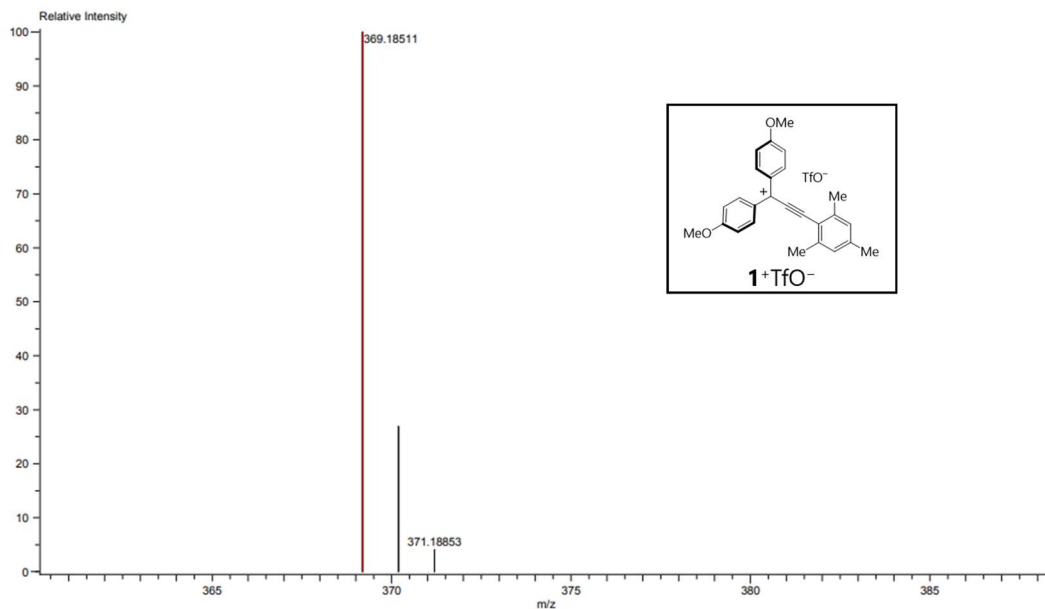

Data:a51008-3  
 Sample Name:u1 tsue / T1100  
 Description:  
 Ionization Mode:FD+  
 History:Determine m/z[Peak Detect[Centroid,20,Area];Correct Base[];Smooth[5]];Add[Smooth[5];Average(MS[1] 1.37);,1.0];...

Acquired:2023/04/13 17:27:00  
 Operator:Administrator  
 Mass Calibration data:800L  
 Created:2023/04/13 17:52:44  
 Created by:Administrator

Charge number:1  
 Element:<sup>12</sup>C:0 .. 100, <sup>1</sup>H:0 .. 200, <sup>16</sup>O:0 .. 10

Tolerance:5.00(mmu)

Unsaturation Number:-1.5 .. 20.0 (Fraction:Both)

| Mass      | Calc. Mass | Mass Difference (mmu) | Mass Difference (ppm) | Possible Formula                                                                        | Unsaturation Number |
|-----------|------------|-----------------------|-----------------------|-----------------------------------------------------------------------------------------|---------------------|
| 369.18511 | 369.18545  | -0.35                 | -0.94                 | <sup>12</sup> C <sub>26</sub> <sup>1</sup> H <sub>25</sub> <sup>16</sup> O <sub>2</sub> | 14.5                |

Figure S9. A HR-MS spectrum of **1**<sup>+</sup>TfO<sup>-</sup>.

Data Name: common/feb21:a60203-  
 Sample: um shimizu / TO626  
 Experiment Date/Time: 2024/02/21 17:00:07

Instrument:JMST-100GCV, Ionization Mode: 1:FD+  
 Acquired m/z Range: 20..1600  
 Spectrum Time Range: Average(MS[1] Time:0.49)

MS Tune Method Name: FD  
 GC:Agilent7890A ,Method: -  
 Detector Volt: 2300[V]

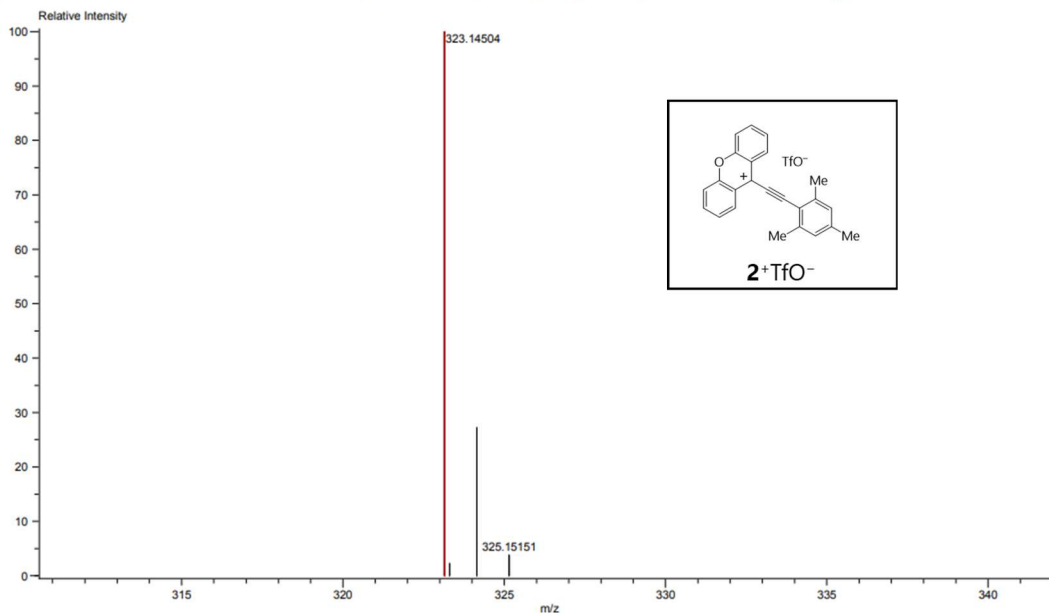

Data:a60203-  
 Sample Name:um shimizu / TO626  
 Description:  
 Ionization Mode:FD+  
 History:Determine m/z[Peak Detect[Centroid,10,Area];Correct Base[];Smooth[5];Add[Smooth[5];Average(MS[1] 0.77);,1.0];...

Acquired:2024/02/21 17:00:07  
 Operator:Administrator  
 Mass Calibration data:1600N2  
 Created:2024/02/21 18:23:12  
 Created by:Administrator

Charge number:1  
 Element: $^{12}C:0 .. 100$ ,  $^1H:0 .. 200$ ,  $^{16}O:0 .. 10$

Tolerance:5.00(mmu)

Unsaturation Number:-1.5 .. 20.0 (Fraction:Both)

| Mass      | Calc. Mass | Mass Difference (mmu) | Mass Difference (ppm) | Possible Formula                | Unsaturation Number |
|-----------|------------|-----------------------|-----------------------|---------------------------------|---------------------|
| 323.14504 | 323.14359  | 1.45                  | 4.48                  | $^{12}C_{24}^{1}H_{19}^{16}O_1$ | 15.5                |
|           | 323.14946  | -4.42                 | -13.69                | $^{12}C_{17}^{1}H_{23}^{16}O_8$ | 6.5                 |

**Figure S10.** A HR-MS spectrum of  $2^+TfO^-$ .



Data Name: common/Feb21:a60195-  
Sample: u1 tsue / T1199  
Experiment Date/Time: 2024/02/21 9:07:37

Instrument:JMST-100GCV, Ionization Mode: 1:FD+  
Acquired m/z Range: 20..1600  
Spectrum Time Range: Average(MS[1] Time:0.83)

MS Tune Method Name: FD  
GC:Agilent7890A, Method: -  
Detector Volt: 2300[V]

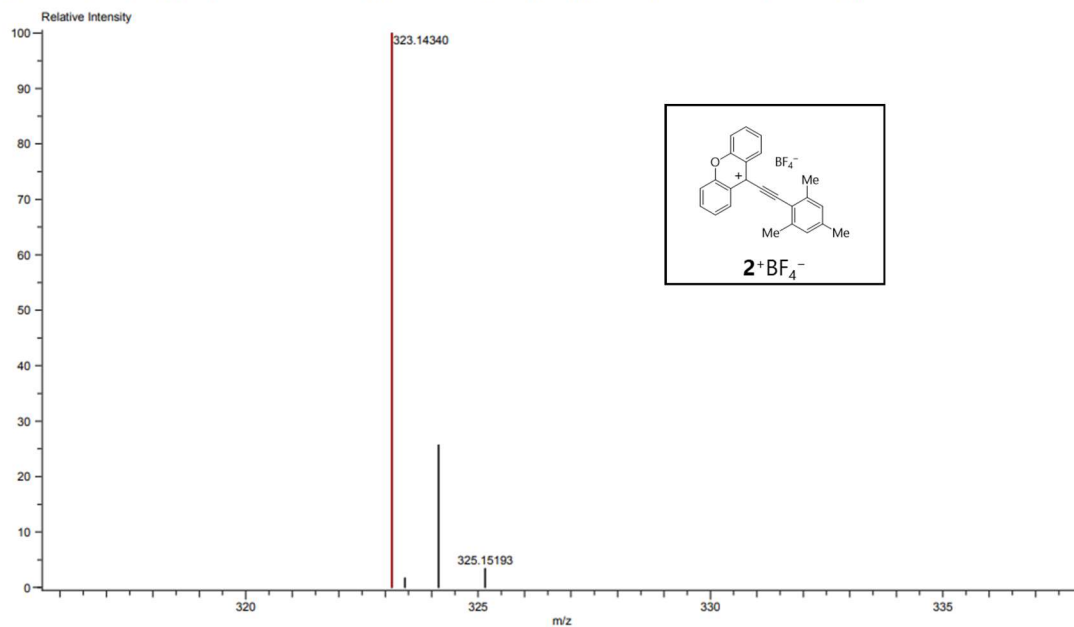

Data:a60195-  
Sample Name:u1 tsue / T1199  
Description:

Ionization Mode:FD+

History:Determine m/z[Peak Detect[Centroid,10,Area];Correct Base[];Smooth[5]];Add[Smooth[5];Average(MS[1] 0.51);,1.0];...

Acquired:2024/02/21 9:07:37

Operator:Administrator

Mass Calibration data:1600N2

Created:2024/02/21 9:14:38

Created by:Administrator

Charge number:1

Tolerance:5.00(mmu)

Unsaturation Number:-1.5 .. 20.0 (Fraction:Both)

Element: $^{12}C:0 .. 100$ ,  $^1H:0 .. 200$ ,  $^{16}O:0 .. 10$

| Mass      | Calc. Mass | Mass Difference (mmu) | Mass Difference (ppm) | Possible Formula            | Unsaturation Number |
|-----------|------------|-----------------------|-----------------------|-----------------------------|---------------------|
| 323.14340 | 323.14359  | -0.19                 | -0.59                 | $^{12}C_{24}H_{19}^{16}O_1$ | 15.5                |

Figure S11. A HR-MS spectrum of  $2^+BF_4^-$ .

Data Name: common/Feb16:a60159-  
Sample: u1 Tsue / T1196  
Experiment Date/Time: 2024/02/16 14:34:46

Instrument:JMST-100GCV, Ionization Mode: 1:FD+  
Acquired m/z Range: 20..1600  
Spectrum Time Range: Average(MS[1] Time:0.26)

MS Tune Method Name: FD  
GC:Agilent7890A, Method: -  
Detector Volt: 2300[V]

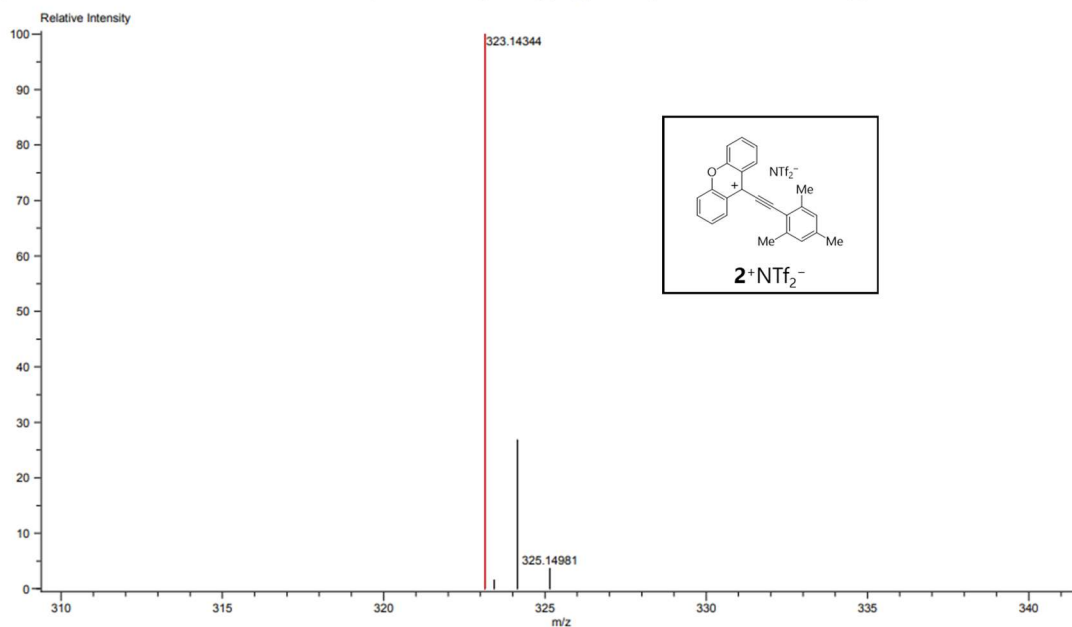

Data:a60159-  
Sample Name:u1 Tsue / T1196  
Description:  
Ionization Mode:FD+  
History:Determine m/z[Peak Detect[Centroid,10,Area];Correct Base[];Smooth[5]];Add[Smooth[5];Average(MS[1] 0.61);,1.0];...

Acquired:2024/02/16 14:34:46  
Operator:Administrator  
Mass Calibration data:1600N2  
Created:2024/02/16 14:49:36  
Created by:Administrator

Charge number:1  
Element: $^{12}C:0 \dots 100$ ,  $^1H:0 \dots 200$ ,  $^{16}O:0 \dots 10$

Tolerance:5.00(mmu)

Unsaturation Number:-1.5 .. 20.0 (Fraction:Both)

| Mass      | Calc. Mass | Mass Difference (mmu) | Mass Difference (ppm) | Possible Formula            | Unsaturation Number |
|-----------|------------|-----------------------|-----------------------|-----------------------------|---------------------|
| 323.14344 | 323.14359  | -0.15                 | -0.46                 | $^{12}C_{24}H_{19}^{16}O_1$ | 15.5                |

Figure S12. A HR-MS spectrum of  $2^+NTf_2^-$ .

#### 2.4 X-ray analyses

A suitable crystal was selected and measured on a Rigaku XtaLAB Synergy (Cu-K $\alpha$  radiation,  $\lambda = 1.54184 \text{ \AA}$ ) with HyPix diffractometer. Using Olex2,<sup>[3]</sup> the structure was solved with the SHELXT<sup>[4]</sup> structure solution program using Intrinsic Phasing and refined with the SHELXL<sup>[5]</sup> refinement package using Least Squares minimization.

##### Crystal data for 1<sup>+</sup>TfO<sup>-</sup> (CCDC: 2346149)

Crystals, dark red needle,  $0.01 \times 0.02 \times 0.60 \text{ mm}^3$ , were obtained by recrystallization from CH<sub>2</sub>Cl<sub>2</sub>/Et<sub>2</sub>O. Crystal Data for C<sub>27</sub>H<sub>25</sub>F<sub>3</sub>O<sub>5</sub>S ( $M = 518.53 \text{ g/mol}$ ): orthorhombic, space group *Pna*2<sub>1</sub> (no. 33),  $a = 30.2694(6) \text{ \AA}$ ,  $b = 7.47312(14) \text{ \AA}$ ,  $c = 21.6600(5) \text{ \AA}$ ,  $V = 4899.63(17) \text{ \AA}^3$ ,  $Z = 8$ ,  $T = 150 \text{ K}$ ,  $\mu(\text{Cu K}\alpha) = 1.703 \text{ mm}^{-1}$ ,  $D_{\text{calc}} = 1.406 \text{ g/cm}^3$ , 20956 reflections measured ( $5.84^\circ \leq 2\theta \leq 155.608^\circ$ ), 8411 unique ( $R_{\text{int}} = 0.0387$ ,  $R_{\text{sigma}} = 0.0444$ ) which were used in all calculations. The final  $RI$  was 0.0595 ( $I > 2\sigma(I)$ ) and  $wR2$  was 0.1708 (all data).

##### Crystal data for 2<sup>+</sup>TfO<sup>-</sup> (CCDC: 2346150)

Crystals, light red plate,  $0.03 \times 0.13 \times 0.25 \text{ mm}^3$ , were obtained by recrystallization from CH<sub>2</sub>Cl<sub>2</sub>/Et<sub>2</sub>O. Crystal Data for C<sub>25</sub>H<sub>19</sub>O<sub>4</sub>F<sub>3</sub>S ( $M = 472.46 \text{ g/mol}$ ): monoclinic, space group *Cc* (no. 9),  $a = 7.3296(2) \text{ \AA}$ ,  $b = 14.8403(4) \text{ \AA}$ ,  $c = 19.7980(6) \text{ \AA}$ ,  $\beta = 99.989(3)^\circ$ ,  $V = 2120.85(11) \text{ \AA}^3$ ,  $Z = 4$ ,  $T = 150 \text{ K}$ ,  $\mu(\text{Cu K}\alpha) = 1.875 \text{ mm}^{-1}$ ,  $D_{\text{calc}} = 1.480 \text{ g/cm}^3$ , 16796 reflections measured ( $9.072^\circ \leq 2\theta \leq 154.542^\circ$ ), 3924 unique ( $R_{\text{int}} = 0.0482$ ,  $R_{\text{sigma}} = 0.0311$ ) which were used in all calculations. The final  $RI$  was 0.0624 ( $I > 2\sigma(I)$ ) and  $wR2$  was 0.1729 (all data).

##### Crystal data for 2<sup>+</sup>BF<sub>4</sub><sup>-</sup> (CCDC: 2346151)

Crystals, red plate,  $0.04 \times 0.14 \times 0.19 \text{ mm}^3$ , were obtained by recrystallization from CH<sub>2</sub>Cl<sub>2</sub>/THF. Crystal Data for C<sub>24</sub>H<sub>19</sub>BOF<sub>4</sub> ( $M = 410.20 \text{ g/mol}$ ): monoclinic, space group *P2*<sub>1</sub>/*n* (no. 14),  $a = 6.8567(3) \text{ \AA}$ ,  $b = 19.3806(9) \text{ \AA}$ ,  $c = 14.5799(6) \text{ \AA}$ ,  $\beta = 93.309(4)^\circ$ ,  $V = 1934.24(14) \text{ \AA}^3$ ,  $Z = 4$ ,  $T = 150 \text{ K}$ ,  $\mu(\text{Cu K}\alpha) = 0.932 \text{ mm}^{-1}$ ,  $D_{\text{calc}} = 1.409 \text{ g/cm}^3$ , 16551 reflections measured ( $7.596^\circ \leq 2\theta \leq 154.832^\circ$ ), 3923 unique ( $R_{\text{int}} = 0.0638$ ,  $R_{\text{sigma}} = 0.0338$ ) which were used in all calculations. The final  $RI$  was 0.0873 ( $I > 2\sigma(I)$ ) and  $wR2$  was 0.2605 (all data).

Crystal data for 2<sup>+</sup>NTf<sub>2</sub><sup>-</sup>

Crystals were obtained by recrystallization from CH<sub>2</sub>Cl<sub>2</sub>/Et<sub>2</sub>O.

Form-A (red plate, 0.06×0.16×0.25 mm<sup>3</sup>, CCDC: 2346152)

Crystal Data for C<sub>26</sub>H<sub>19</sub>NO<sub>5</sub>F<sub>6</sub>S<sub>2</sub> (M =603.54 g/mol): triclinic, space group *P*-1 (no. 2), *a* = 7.78770(10) Å, *b* = 13.5269(3) Å, *c* = 14.2246(3) Å,  $\alpha$  = 115.433(2)°,  $\beta$  = 102.323(2)°,  $\gamma$  = 95.020(2)°, *V* = 1294.52(5) Å<sup>3</sup>, *Z* = 2, *T* = 150 K,  $\mu$ (Cu K $\alpha$ ) = 2.622 mm<sup>-1</sup>, *D*<sub>calc</sub> = 1.548 g/cm<sup>3</sup>, 25054 reflections measured (7.166° ≤ 2 $\Theta$  ≤ 154.572°), 5270 unique (*R*<sub>int</sub> = 0.0391, *R*<sub>sigma</sub> = 0.0243) which were used in all calculations. The final *R**I* was 0.0401 (*I* > 2 $\sigma$ (*I*)) and *wR*<sub>2</sub> was 0.1146 (all data).

Form-B (red block, 0.17×0.23×0.30 mm<sup>3</sup>, CCDC: 2346153)

Crystal Data for C<sub>26</sub>H<sub>19</sub>NO<sub>5</sub>F<sub>6</sub>S<sub>2</sub> (M =603.54 g/mol): triclinic, space group *P*-1 (no. 2), *a* = 14.24260(18) Å, *b* = 14.5647(2) Å, *c* = 15.1706(2) Å,  $\alpha$  = 117.8081(14)°,  $\beta$  = 98.1608(11)°,  $\gamma$  = 104.9911(12)°, *V* = 2558.63(7) Å<sup>3</sup>, *Z* = 4, *T* = 150 K,  $\mu$ (Cu K $\alpha$ ) = 2.653 mm<sup>-1</sup>, *D*<sub>calc</sub> = 1.567 g/cm<sup>3</sup>, 49231 reflections measured (6.752° ≤ 2 $\Theta$  ≤ 154.658°), 10472 unique (*R*<sub>int</sub> = 0.0409, *R*<sub>sigma</sub> = 0.0268) which were used in all calculations. The final *R**I* was 0.0351 (*I* > 2 $\sigma$ (*I*)) and *wR*<sub>2</sub> was 0.1011 (all data).

2.5 X-ray structures

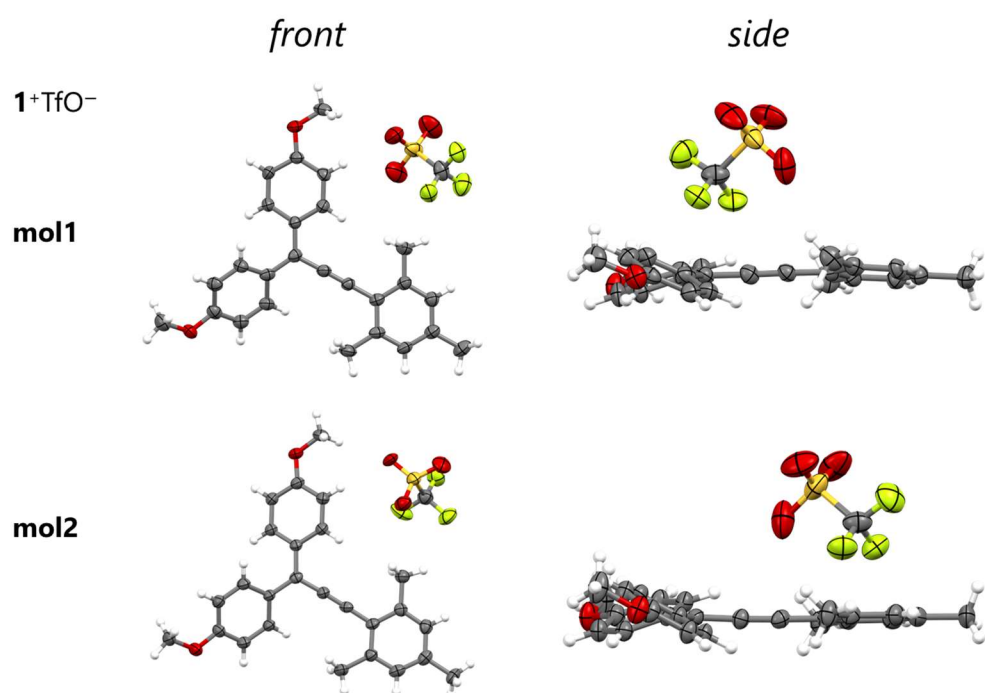

**Figure S13.** X-ray structures (front and side views) of **1<sup>+</sup>TfO<sup>-</sup>** at 150 K.

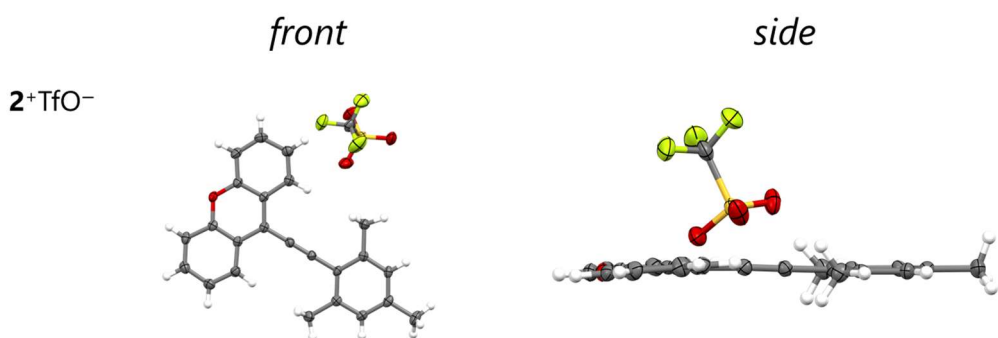

**Figure S14.** X-ray structures (front and side views) of **2<sup>+</sup>TfO<sup>-</sup>** at 150 K.

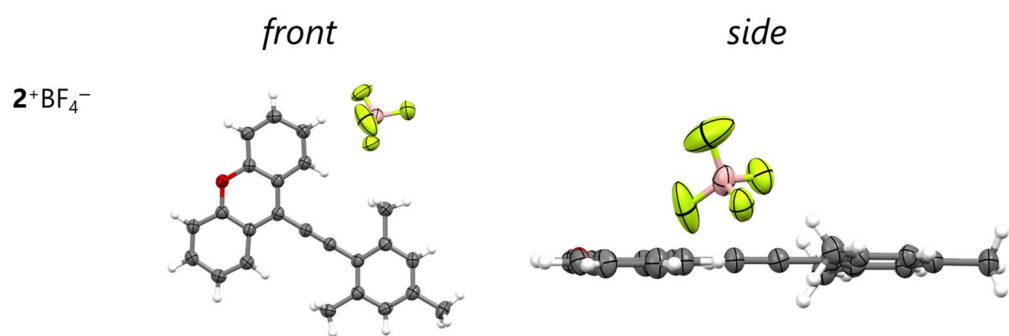

**Figure S15.** X-ray structures (front and side views) of **2<sup>+</sup>BF<sub>4</sub><sup>-</sup>** at 150 K.

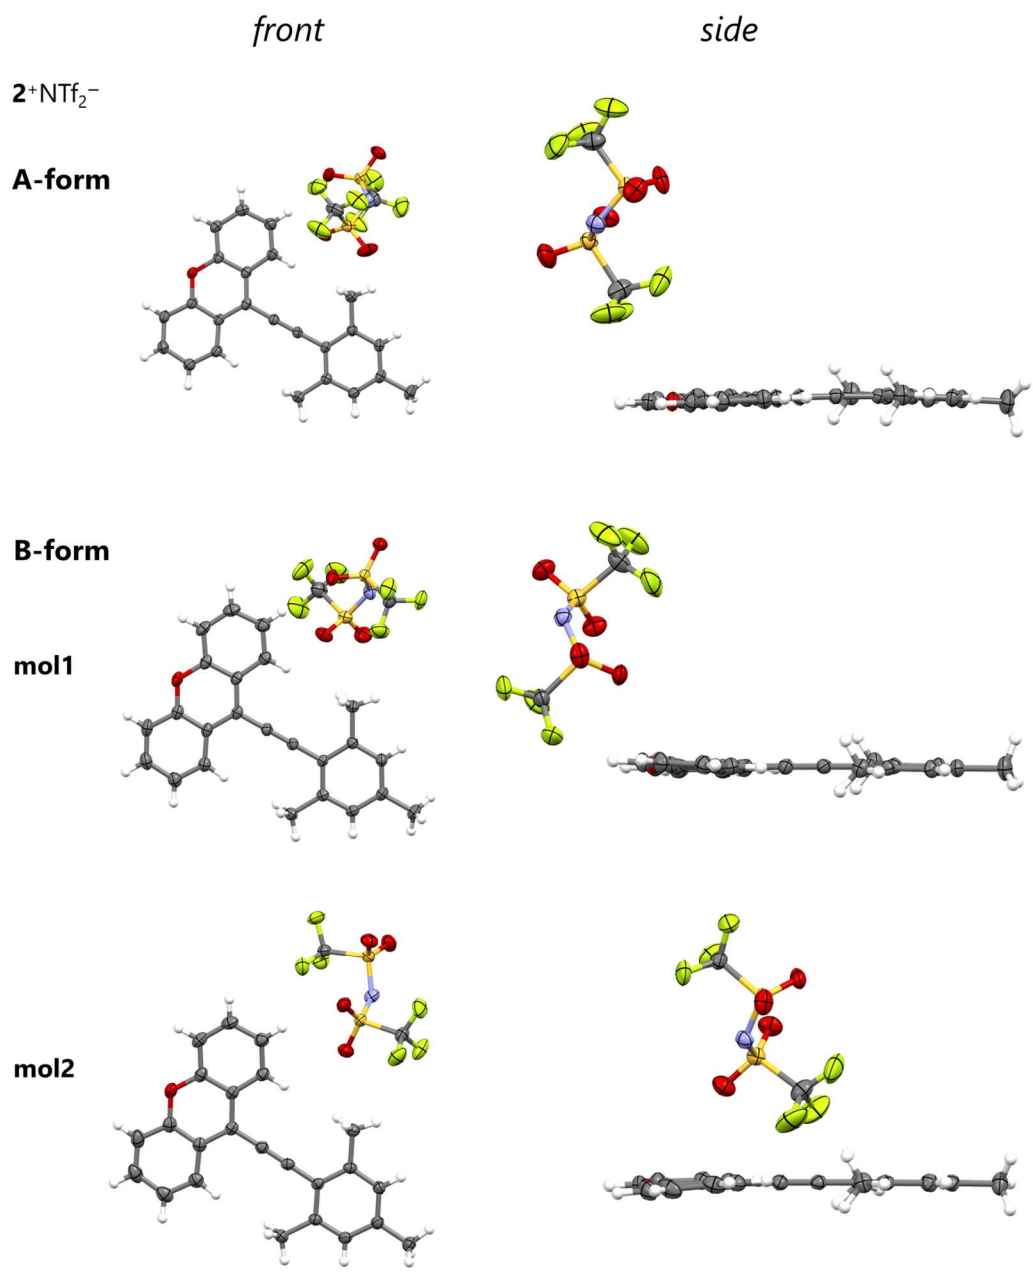

**Figure S16.** X-ray structures (front and side views) of  $2^+NTf_2^-$  at 150 K.

2.6 Crystal packings

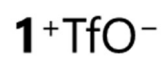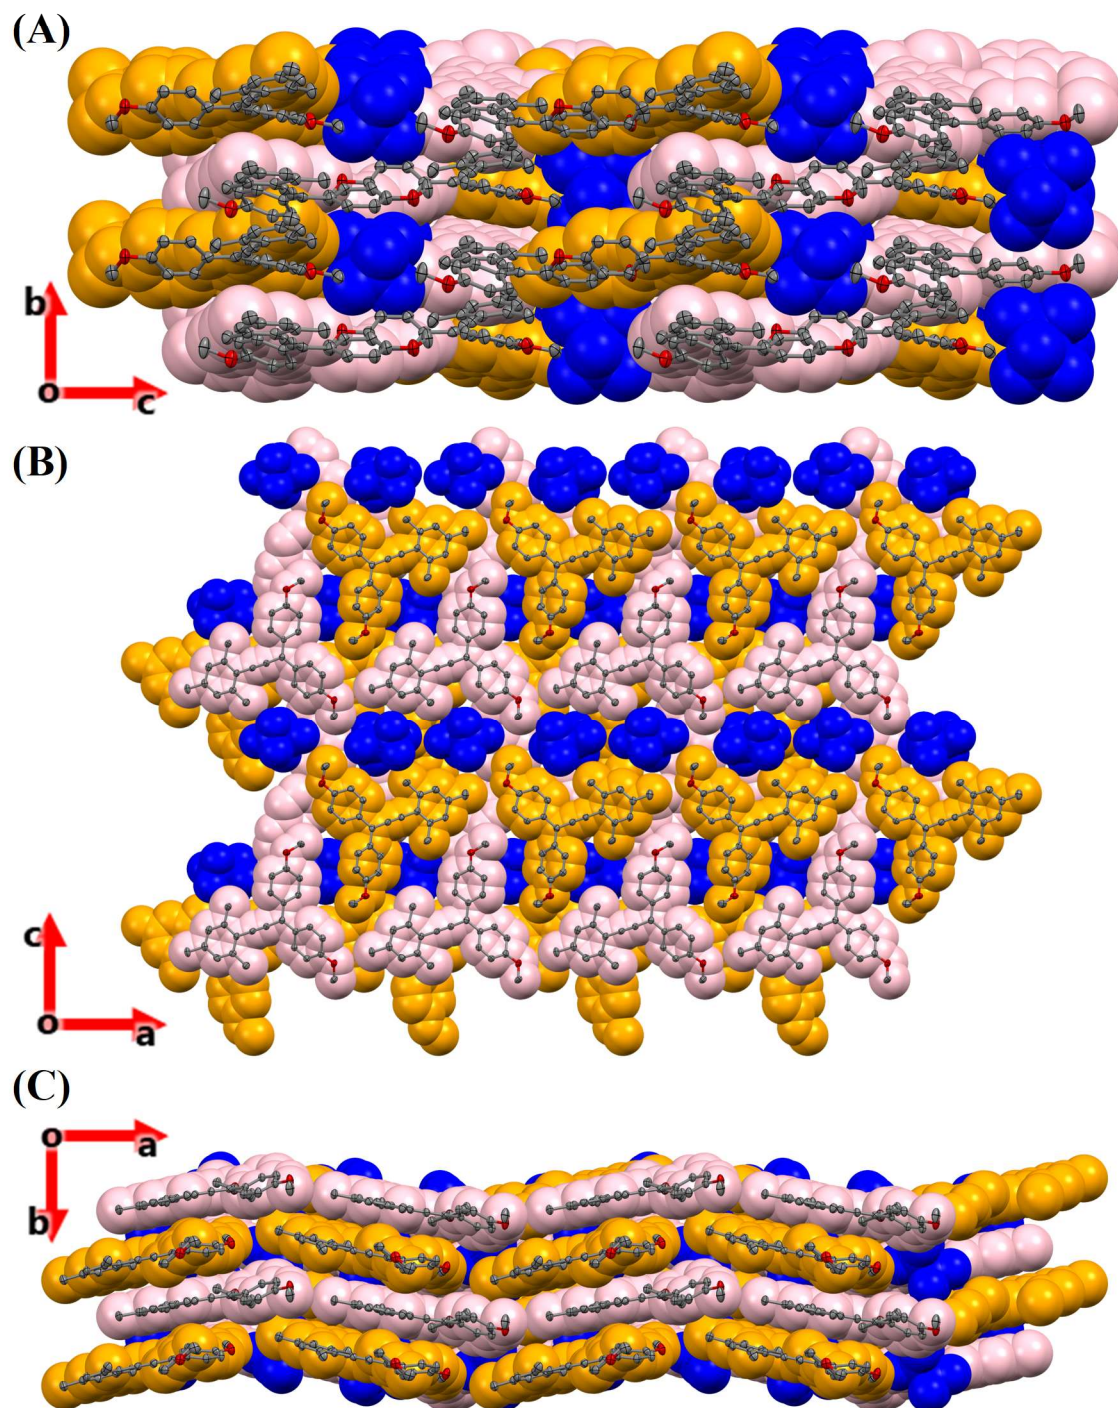

Figure S17. Crystal structures of  $1^+TfO^-$  at 150 K (orange: mol.1, pink: mol.2).

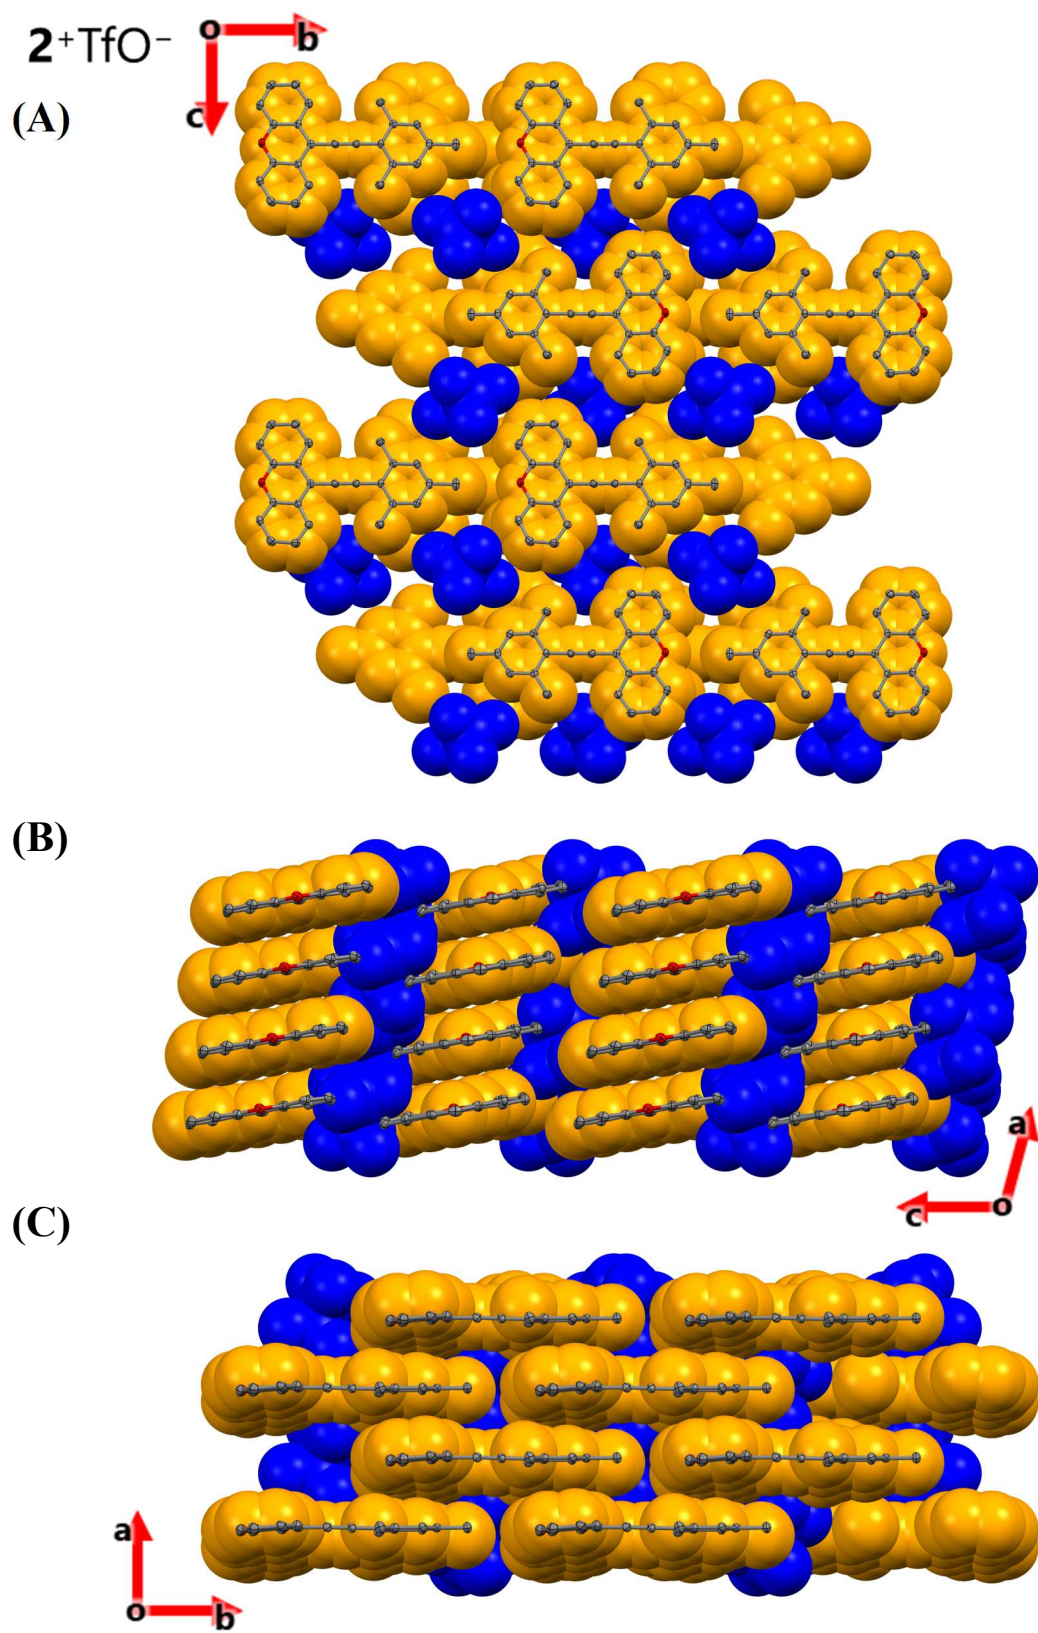

Figure S18. Crystal structures of  $2^+\text{TfO}^-$  at 150 K.



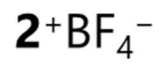

(A)

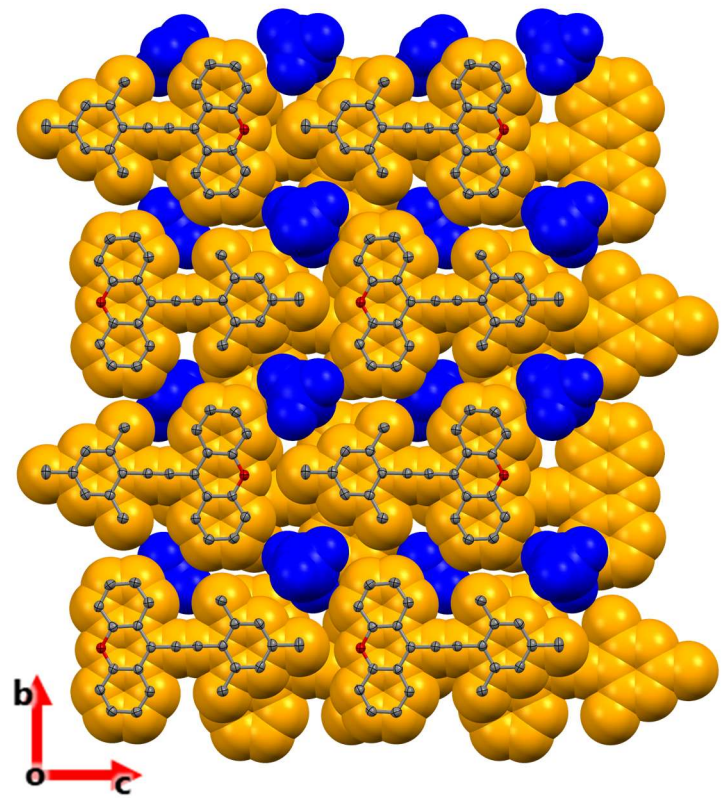

(B)

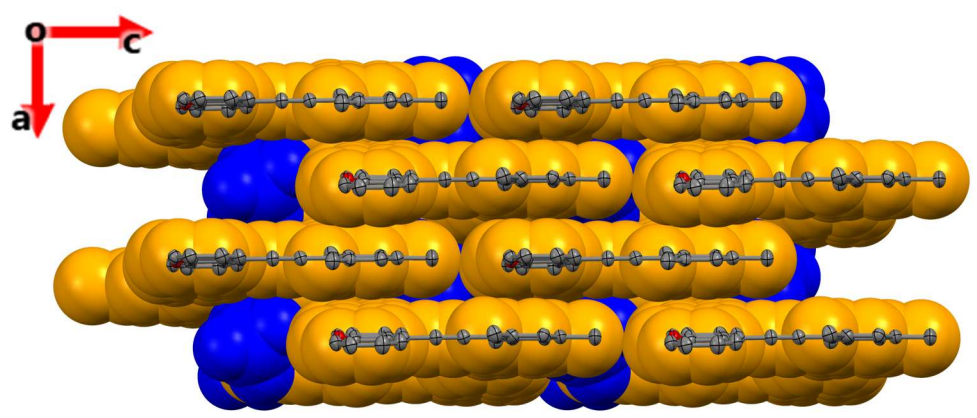

(C)

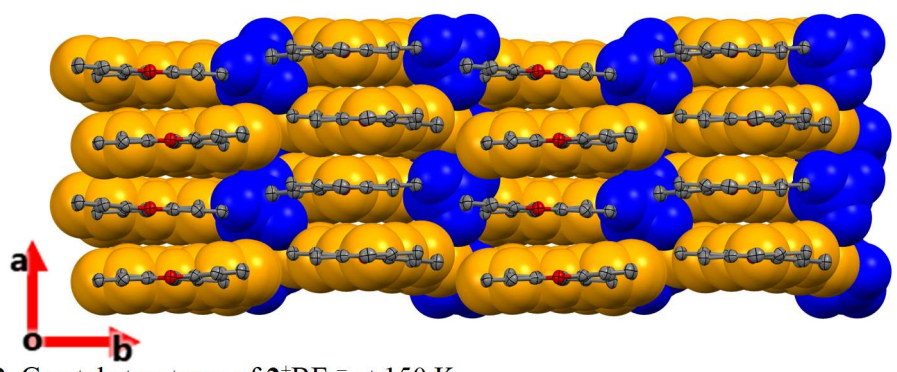

Figure S19. Crystal structures of  $2^+BF_4^-$  at 150 K.

$2^+\text{NTf}_2^-$  (A-form)

(A)

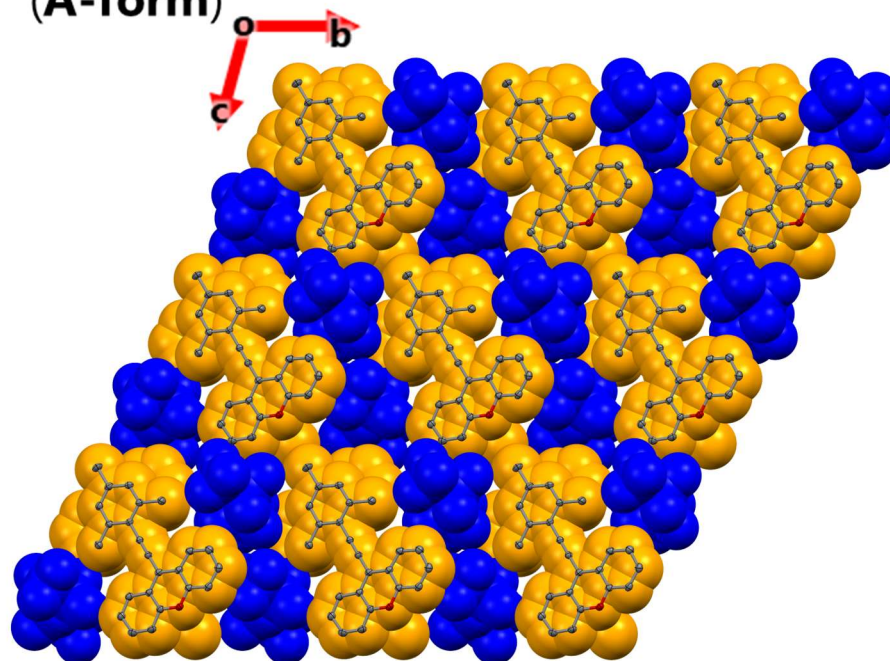

(B)

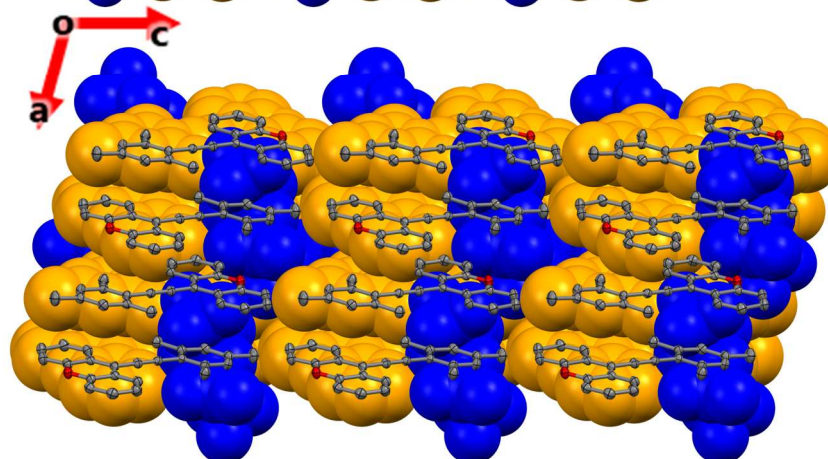

(C)

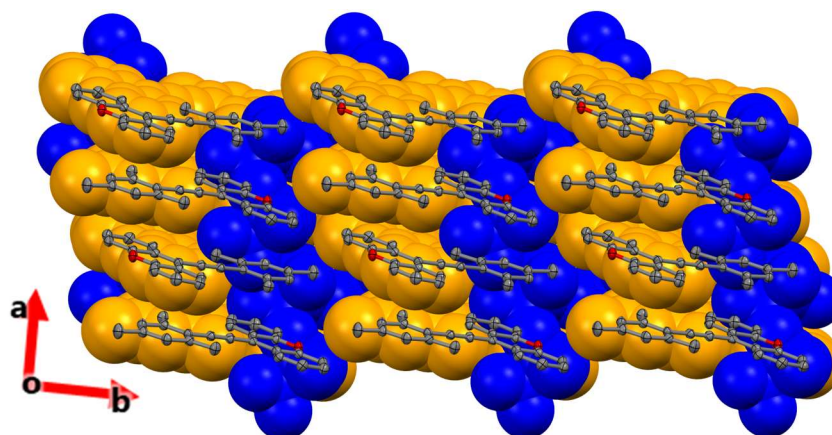

Figure S20. Crystal structures of  $2^+\text{NTf}_2^-$  (A-form) at 150 K.

$2^+\text{NTf}_2^-$  (**B-form**)

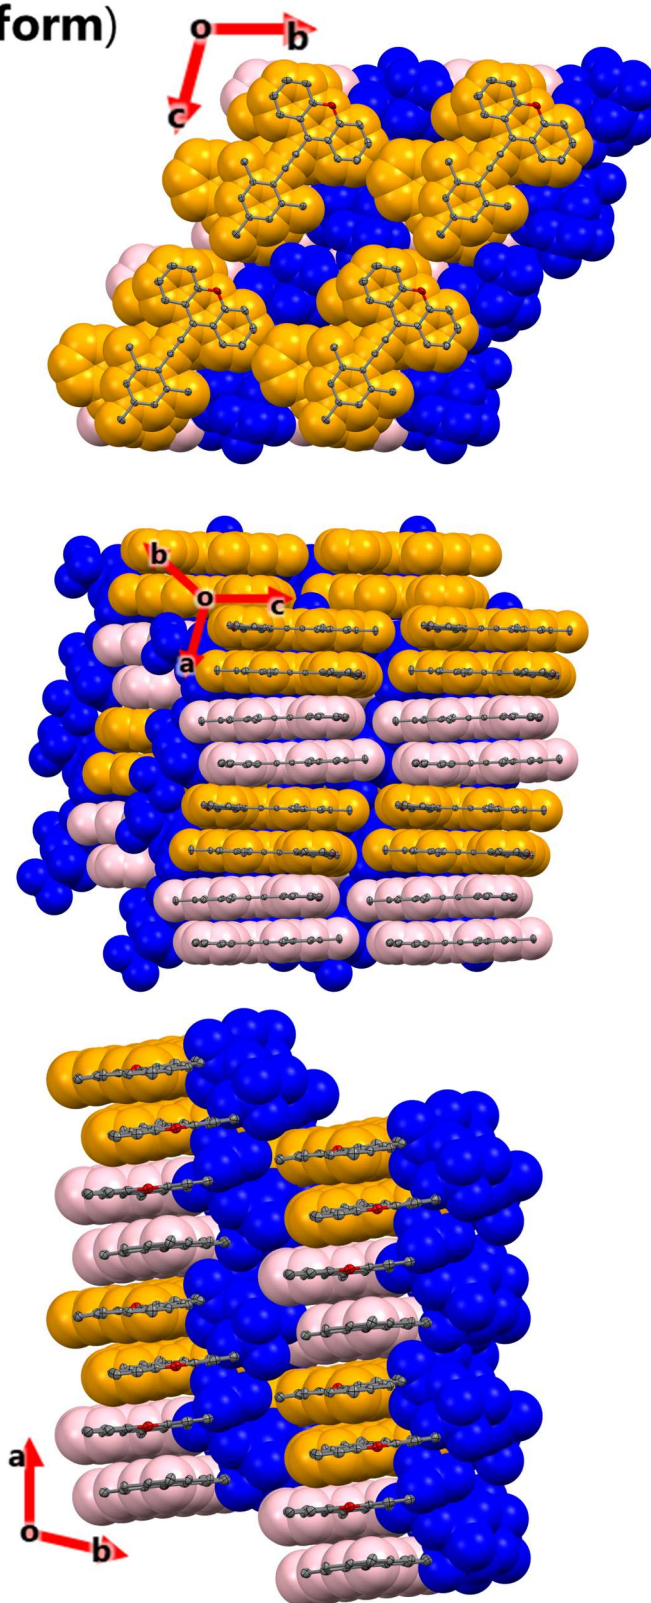

**Figure S21.** Crystal structures of  $2^+\text{NTf}_2^-$  (**B-form**) at 150 K (orange: mol.1, pink: mol.2).

## 2.7 Optical measurements

### Solution

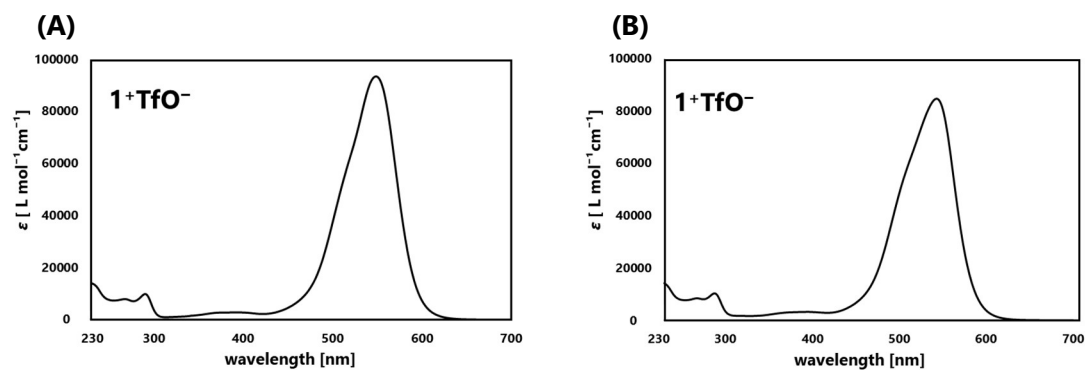

**Figure S22.** UV/Vis absorption spectra of  $1^+TfO^-$  (A) in  $CH_2Cl_2$  (150  $\mu M$ ) and (B) in  $CH_3CN$  (150  $\mu M$ ).

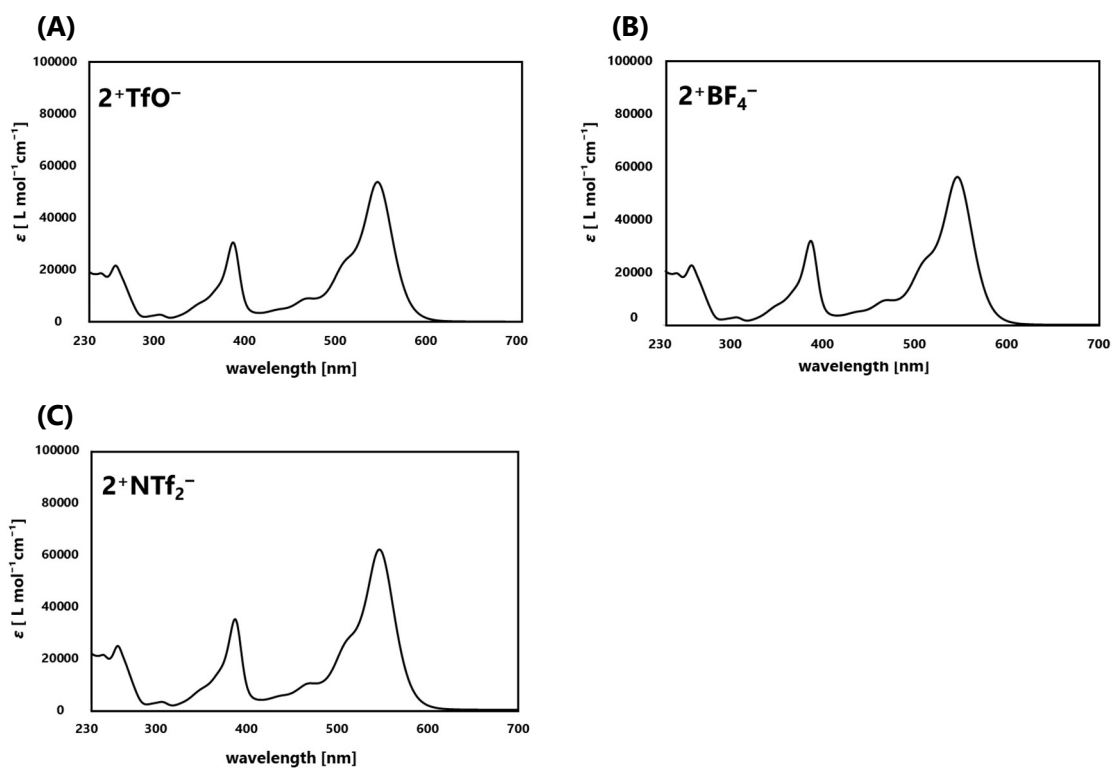

**Figure S23.** UV/Vis absorption spectra of (A)  $2^+TfO^-$ , (B)  $2^+BF_4^-$  and (C)  $2^+NTf_2^-$  in  $CH_2Cl_2$  (25.4  $\mu M$ ).

### 3. Theoretical Studies

#### 3.1 TD-DFT

Simulated spectra for  $1^+$ ,  $2^+$

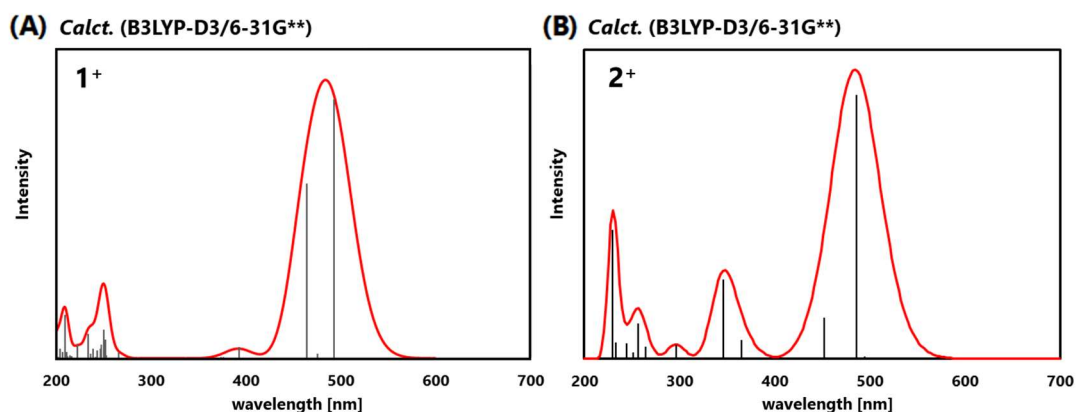

**Figure S24.** Simulated UV/Vis spectra by TD-DFT calculations for (A)  $1^+$  and (B)  $2^+$  at B3LYP-D3/6-31G\*\* level of theory.

Excitation parameters for the  $S_0 \rightarrow S_1$  transitions of  $1^+$  predicted by TD-DFT calculations at B3LYP-D3/6-31G\*\* level

HOMO: 98, LUMO: 99

Excitation energies and oscillator strengths:

Excited State 1: Singlet-A 2.5159 eV 492.80 nm  $f=0.7940$   $\langle S^{*2} \rangle = 0.000$   
98 -> 99 0.70515

This state for optimization and/or second-order correction.

Total Energy,  $E(\text{TD-HF/TD-DFT}) = -1156.00589929$

Copying the excited state density for this state as the 1-particle RhoCI density.

Excited State 2: Singlet-A 2.6088 eV 475.25 nm  $f=0.0145$   $\langle S^{*2} \rangle = 0.000$   
96 -> 99 0.67671  
97 -> 99 0.20068

Excited State 3: Singlet-A 2.6713 eV 464.14 nm  $f=0.5350$   $\langle S^{*2} \rangle = 0.000$   
96 -> 99 -0.20087  
97 -> 99 0.67689

Excited State 4: Singlet-A 3.1569 eV 392.75 nm  $f=0.0343$   $\langle S^{*2} \rangle = 0.000$

|                                                                       |          |
|-----------------------------------------------------------------------|----------|
| 92 -> 99                                                              | -0.33200 |
| 94 -> 99                                                              | -0.11983 |
| 95 -> 99                                                              | 0.60326  |
| Excited State 5: Singlet-A 3.2975 eV 376.00 nm f=0.0030 <S**2>=0.000  |          |
| 92 -> 99                                                              | -0.26262 |
| 93 -> 99                                                              | -0.32566 |
| 94 -> 99                                                              | 0.56612  |
| Excited State 6: Singlet-A 3.3160 eV 373.90 nm f=0.0027 <S**2>=0.000  |          |
| 92 -> 99                                                              | 0.46956  |
| 93 -> 99                                                              | -0.43334 |
| 95 -> 99                                                              | 0.29361  |
| Excited State 7: Singlet-A 3.7447 eV 331.09 nm f=0.0002 <S**2>=0.000  |          |
| 92 -> 99                                                              | 0.30320  |
| 93 -> 99                                                              | 0.43339  |
| 94 -> 99                                                              | 0.38273  |
| 95 -> 99                                                              | 0.19837  |
| 98 ->100                                                              | 0.14723  |
| Excited State 8: Singlet-A 4.6647 eV 265.79 nm f=0.0184 <S**2>=0.000  |          |
| 91 -> 99                                                              | 0.64544  |
| 98 ->100                                                              | 0.22679  |
| Excited State 9: Singlet-A 4.8996 eV 253.05 nm f=0.0086 <S**2>=0.000  |          |
| 88 -> 99                                                              | 0.14177  |
| 90 -> 99                                                              | 0.58912  |
| 97 ->100                                                              | -0.34128 |
| Excited State 10: Singlet-A 4.9190 eV 252.05 nm f=0.0558 <S**2>=0.000 |          |
| 89 -> 99                                                              | 0.56710  |
| 91 -> 99                                                              | -0.14335 |
| 98 ->100                                                              | 0.31945  |
| Excited State 11: Singlet-A 4.9384 eV 251.06 nm f=0.0535 <S**2>=0.000 |          |

88 -> 99 0.12745  
89 -> 99 0.24570  
90 -> 99 0.23765  
97 ->100 0.48565  
98 ->101 0.30660

Excited State 12: Singlet-A 4.9597 eV 249.98 nm f=0.0884 <S\*\*2>=0.000

89 -> 99 -0.30299  
90 -> 99 0.13499  
91 -> 99 -0.16530  
97 ->100 0.23813  
97 ->101 0.15187  
98 ->100 0.45386  
98 ->102 -0.13272

Excited State 13: Singlet-A 5.0026 eV 247.84 nm f=0.0410 <S\*\*2>=0.000

88 -> 99 -0.12329  
96 ->100 0.16584  
97 ->100 -0.21483  
97 ->101 0.13816  
98 ->100 0.12694  
98 ->101 0.56228  
98 ->104 -0.10379

Excited State 14: Singlet-A 5.0202 eV 246.97 nm f=0.0297 <S\*\*2>=0.000

96 ->100 0.56074  
98 ->101 -0.15496  
98 ->104 -0.36026

Excited State 15: Singlet-A 5.0908 eV 243.55 nm f=0.0248 <S\*\*2>=0.000

88 -> 99 0.21556  
95 ->100 0.13594  
97 ->101 0.53547  
97 ->102 0.18023  
98 ->100 -0.17371  
98 ->103 -0.10472

Excited State 16: Singlet-A 5.1334 eV 241.52 nm f=0.0028 <S\*\*2>=0.000

86 -> 99 -0.11466

87 -> 99 0.60392

88 -> 99 -0.25764

98 ->102 -0.15174

Excited State 17: Singlet-A 5.1360 eV 241.40 nm f=0.0049 <S\*\*2>=0.000

86 -> 99 0.23305

87 -> 99 0.33938

88 -> 99 0.45393

90 -> 99 -0.13879

97 ->101 -0.10435

98 ->102 0.24308

Excited State 18: Singlet-A 5.1831 eV 239.21 nm f=0.0280 <S\*\*2>=0.000

86 -> 99 -0.29451

97 ->101 0.21918

98 ->102 0.52235

98 ->103 0.19032

Excited State 19: Singlet-A 5.2084 eV 238.05 nm f=0.0017 <S\*\*2>=0.000

86 -> 99 0.57374

88 -> 99 -0.25374

97 ->101 0.13298

98 ->102 0.10370

98 ->103 0.22739

Excited State 20: Singlet-A 5.2582 eV 235.79 nm f=0.0151 <S\*\*2>=0.000

97 ->102 0.42821

97 ->103 0.37482

98 ->101 0.15406

98 ->103 0.31074

Excited State 21: Singlet-A 5.3141 eV 233.31 nm f=0.0745 <S\*\*2>=0.000

88 -> 99 0.17910



90 -> 99 -0.10916  
97 ->100 -0.10891  
97 ->102 -0.22960  
97 ->103 -0.16789  
98 ->102 -0.28033  
98 ->103 0.50459

Excited State 22: Singlet-A 5.4254 eV 228.52 nm f=0.0023 <S\*\*2>=0.000

85 -> 99 0.66972  
97 ->103 -0.10812

Excited State 23: Singlet-A 5.5687 eV 222.65 nm f=0.0408 <S\*\*2>=0.000

93 ->101 0.10671  
94 ->101 -0.10752  
95 ->102 -0.10780  
97 ->101 0.14919  
97 ->102 -0.39217  
97 ->103 0.46923  
98 ->100 -0.12147

Excited State 24: Singlet-A 5.6378 eV 219.92 nm f=0.0004 <S\*\*2>=0.000

96 ->101 0.70300

Excited State 25: Singlet-A 5.7435 eV 215.87 nm f=0.0069 <S\*\*2>=0.000

81 -> 99 -0.16110  
83 -> 99 0.50341  
84 -> 99 -0.34851  
98 ->105 0.19714

Excited State 26: Singlet-A 5.7627 eV 215.15 nm f=0.0007 <S\*\*2>=0.000

83 -> 99 0.28855  
84 -> 99 0.56815  
98 ->105 0.21499

Excited State 27: Singlet-A 5.7792 eV 214.54 nm f=0.0081 <S\*\*2>=0.000

96 ->100 -0.15630

96 ->102 0.65352  
98 ->104 -0.16896

Excited State 28: Singlet-A 5.7928 eV 214.03 nm f=0.0003 <S\*\*2>=0.000

83 -> 99 -0.18705  
84 -> 99 -0.17676  
92 ->100 -0.28011  
93 ->100 0.14488  
94 ->100 0.14396  
95 ->100 0.31564  
98 ->105 0.40963  
98 ->106 0.14617

Excited State 29: Singlet-A 5.8025 eV 213.67 nm f=0.0023 <S\*\*2>=0.000

83 -> 99 -0.21098  
92 ->100 0.37273  
93 ->100 -0.14199  
95 ->100 -0.24623  
96 ->104 -0.10608  
98 ->105 0.36091  
98 ->106 0.18216

Excited State 30: Singlet-A 5.8547 eV 211.77 nm f=0.0069 <S\*\*2>=0.000

82 -> 99 0.67983

Excited State 31: Singlet-A 5.8821 eV 210.78 nm f=0.0185 <S\*\*2>=0.000

96 ->100 -0.14044  
96 ->102 -0.17582  
96 ->103 0.63509  
98 ->104 -0.19599

Excited State 32: Singlet-A 5.9333 eV 208.96 nm f=0.1336 <S\*\*2>=0.000

96 ->100 0.30181  
96 ->102 0.17140  
96 ->103 0.28488  
96 ->105 0.18482

98 ->104 0.49462

Excited State 33: Singlet-A 5.9485 eV 208.43 nm f=0.0009 <S\*\*2>=0.000  
97 ->104 0.70234

Excited State 34: Singlet-A 6.0014 eV 206.59 nm f=0.0188 <S\*\*2>=0.000  
94 ->100 0.61092  
95 ->100 -0.26400

Excited State 35: Singlet-A 6.0789 eV 203.96 nm f=0.0297 <S\*\*2>=0.000  
92 ->100 0.32412  
93 ->100 -0.33845  
94 ->100 0.20743  
95 ->100 0.42298  
95 ->102 0.10918

Excited State 36: Singlet-A 6.1325 eV 202.18 nm f=0.0049 <S\*\*2>=0.000  
81 -> 99 -0.37952  
83 -> 99 -0.12078  
92 ->100 0.27251  
93 ->100 0.39812  
94 ->101 -0.13107  
95 ->100 0.12927  
95 ->101 -0.14959  
96 ->104 0.10725

Excited State 37: Singlet-A 6.1471 eV 201.70 nm f=0.0022 <S\*\*2>=0.000  
81 -> 99 0.49362  
83 -> 99 0.16006  
92 ->100 0.12365  
93 ->100 0.22189  
94 ->101 -0.25785  
95 ->101 -0.23271  
97 ->105 0.10402

Excited State 38: Singlet-A 6.1773 eV 200.71 nm f=0.0418 <S\*\*2>=0.000

|          |          |
|----------|----------|
| 81 -> 99 | 0.14902  |
| 92 ->100 | 0.21202  |
| 93 ->100 | 0.25395  |
| 93 ->101 | 0.13869  |
| 94 ->101 | 0.14918  |
| 95 ->101 | 0.42943  |
| 95 ->102 | -0.17382 |
| 97 ->105 | -0.22546 |

Excited State 39: Singlet-A 6.2389 eV 198.73 nm f=0.0030 <S\*\*2>=0.000

|          |          |
|----------|----------|
| 79 -> 99 | -0.10248 |
| 94 ->101 | 0.31332  |
| 95 ->102 | -0.11017 |
| 97 ->105 | 0.58363  |
| 97 ->106 | 0.10584  |

Excited State 40: Singlet-A 6.2758 eV 197.56 nm f=0.0367 <S\*\*2>=0.000

|          |          |
|----------|----------|
| 76 -> 99 | 0.10418  |
| 78 -> 99 | 0.23735  |
| 79 -> 99 | 0.53451  |
| 83 -> 99 | 0.10592  |
| 94 ->101 | -0.16538 |
| 95 ->101 | 0.16398  |
| 97 ->105 | 0.18221  |

Excitation parameters for the  $S_0 \rightarrow S_1$  transitions of  $2^+$  predicted by TD-DFT calculations at B3LYP-D3/6-31G\*\* level

HOMO:85, LUMO:86

Excitation energies and oscillator strengths:

Excited State 1: Singlet-A 2.5054 eV 494.87 nm  $f=0.0061$   $\langle S^{**2} \rangle = 0.000$   
84 -> 86 0.70611

This state for optimization and/or second-order correction.

Total Energy,  $E(\text{TD-HF/TD-DFT}) = -1000.96655168$

Copying the excited state density for this state as the 1-particle RhoCI density.

Excited State 2: Singlet-A 2.5498 eV 486.24 nm  $f=0.6835$   $\langle S^{**2} \rangle = 0.000$   
83 -> 86 0.18118  
85 -> 86 0.68438

Excited State 3: Singlet-A 2.7441 eV 451.83 nm  $f=0.1058$   $\langle S^{**2} \rangle = 0.000$   
83 -> 86 0.67880  
85 -> 86 -0.18463

Excited State 4: Singlet-A 3.3344 eV 371.83 nm  $f=0.0000$   $\langle S^{**2} \rangle = 0.000$   
80 -> 86 0.70308

Excited State 5: Singlet-A 3.3970 eV 364.98 nm  $f=0.0489$   $\langle S^{**2} \rangle = 0.000$   
81 -> 86 0.59972  
82 -> 86 0.36405

Excited State 6: Singlet-A 3.5850 eV 345.84 nm  $f=0.2053$   $\langle S^{**2} \rangle = 0.000$   
81 -> 86 -0.36800  
82 -> 86 0.58593  
83 -> 88 0.13353

Excited State 7: Singlet-A 4.1842 eV 296.32 nm  $f=0.0361$   $\langle S^{**2} \rangle = 0.000$   
79 -> 86 0.65386  
85 -> 87 -0.24430

Excited State 8: Singlet-A 4.6789 eV 264.99 nm  $f=0.0312$   $\langle S^{**2} \rangle = 0.000$

85 -> 88 0.69987

Excited State 9: Singlet-A 4.8286 eV 256.77 nm f=0.0917 <S\*\*2>=0.000  
78 -> 86 -0.14603  
79 -> 86 0.19699  
82 -> 88 0.10222  
83 -> 87 0.12388  
84 -> 91 -0.10396  
85 -> 87 0.60888  
85 -> 90 -0.12797

Excited State 10: Singlet-A 4.9210 eV 251.95 nm f=0.0174 <S\*\*2>=0.000  
84 -> 87 0.62769  
85 -> 91 0.29306

Excited State 11: Singlet-A 5.0272 eV 246.63 nm f=0.0000 <S\*\*2>=0.000  
77 -> 86 0.69615

Excited State 12: Singlet-A 5.0652 eV 244.78 nm f=0.0007 <S\*\*2>=0.000  
76 -> 86 0.69196

Excited State 13: Singlet-A 5.0715 eV 244.47 nm f=0.0403 <S\*\*2>=0.000  
83 -> 88 -0.38149  
85 -> 89 0.56260

Excited State 14: Singlet-A 5.0792 eV 244.10 nm f=0.0000 <S\*\*2>=0.000  
78 -> 86 0.66047  
81 -> 88 0.10608  
82 -> 88 0.13342

Excited State 15: Singlet-A 5.1849 eV 239.13 nm f=0.0001 <S\*\*2>=0.000  
84 -> 88 0.70592

Excited State 16: Singlet-A 5.2124 eV 237.86 nm f=0.0002 <S\*\*2>=0.000  
74 -> 86 0.69618

Excited State 17: Singlet-A 5.3170 eV 233.18 nm f=0.0419 <S\*\*2>=0.000

75 -> 86 0.16395

83 -> 87 0.65420

85 -> 87 -0.11121

Excited State 18: Singlet-A 5.3888 eV 230.08 nm f=0.3330 <S\*\*2>=0.000

82 -> 86 -0.10614

82 -> 87 -0.24638

83 -> 88 0.49257

85 -> 89 0.40899

Excited State 19: Singlet-A 5.4830 eV 226.12 nm f=0.0000 <S\*\*2>=0.000

75 -> 86 0.58709

83 -> 87 -0.14899

85 -> 90 -0.33161

Excited State 20: Singlet-A 5.5923 eV 221.70 nm f=0.0000 <S\*\*2>=0.000

72 -> 86 0.23405

73 -> 86 -0.36600

85 -> 92 0.53666

3.2 Optimized structures

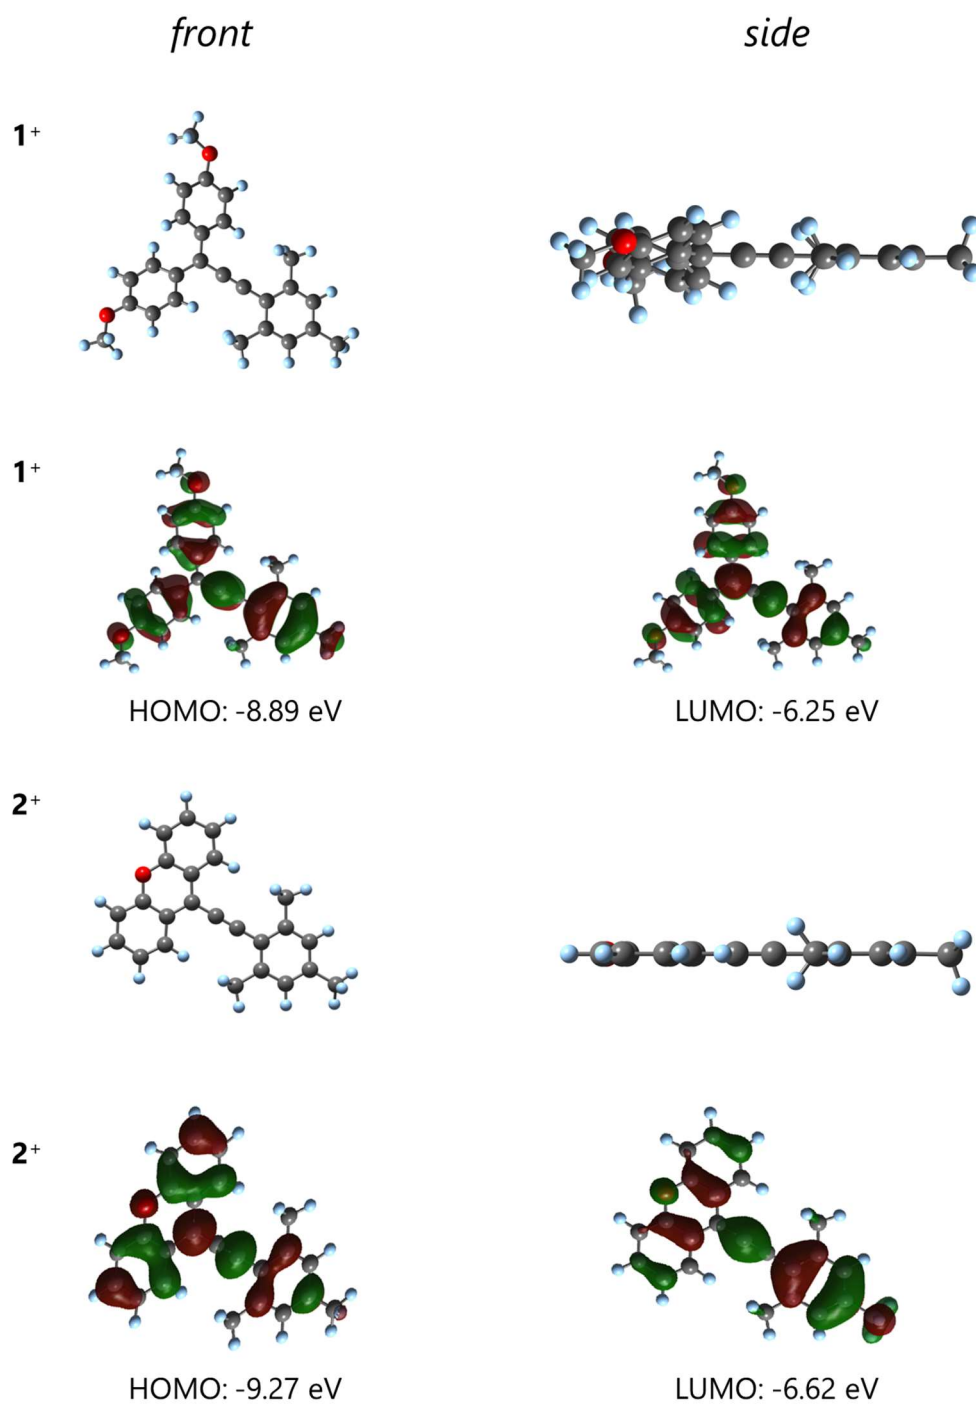

**Figure S25.** Optimized structures and Kohn–Sham orbitals for propargyl cations  $1^+$  and  $2^+$  calculated at the B3LYP-D3/6-31G\*\* level.



### 3.3 Cartesian coordinates of optimized structures of $I^+$

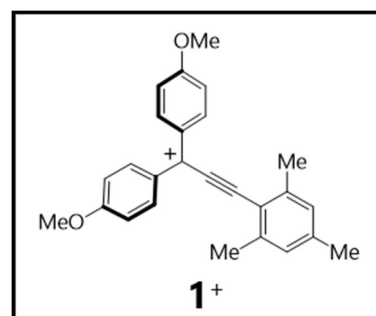

| center number | Symbol | x            | y            | z            |
|---------------|--------|--------------|--------------|--------------|
| 1             | C      | 0.901240857  | 0.029235187  | -0.057760688 |
| 2             | C      | -0.483431143 | -0.068946507 | -0.034128352 |
| 3             | C      | -1.708535253 | -0.160361153 | -0.016541801 |
| 4             | C      | -3.103370904 | -0.264371998 | 0.003060069  |
| 5             | C      | -3.898883613 | 0.917880487  | -0.084349994 |
| 6             | C      | -3.712443493 | -1.550879841 | 0.113183520  |
| 7             | C      | -5.280166627 | 0.783876540  | -0.059043526 |
| 8             | C      | -5.098785172 | -1.621638935 | 0.133270801  |
| 9             | C      | -5.900333364 | -0.471931834 | 0.046125301  |
| 10            | H      | -5.899316392 | 1.674286478  | -0.121737080 |
| 11            | H      | -5.577348708 | -2.592999244 | 0.219823464  |
| 12            | C      | 1.674669777  | -1.195067446 | -0.077598700 |
| 13            | C      | 2.980197893  | -1.258812470 | 0.467609826  |
| 14            | C      | 1.110215149  | -2.396357957 | -0.586897125 |
| 15            | C      | 3.699371593  | -2.441824195 | 0.488460561  |
| 16            | H      | 3.409746666  | -0.377831355 | 0.930231309  |
| 17            | C      | 1.822120435  | -3.572475677 | -0.588646029 |
| 18            | H      | 0.111715113  | -2.371954282 | -1.008932444 |
| 19            | C      | 3.130155100  | -3.612214084 | -0.052445791 |
| 20            | H      | 4.683199169  | -2.459618907 | 0.939435855  |
| 21            | H      | 1.409581996  | -4.486899244 | -0.999662026 |
| 22            | C      | 1.497202312  | 1.350002442  | -0.063645988 |
| 23            | C      | 2.762142333  | 1.598388855  | -0.662605133 |
| 24            | C      | 0.797367062  | 2.453598494  | 0.481339506  |
| 25            | C      | 3.297721817  | 2.866968917  | -0.690648611 |
| 26            | H      | 3.290128568  | 0.789716556  | -1.154174438 |
| 27            | C      | 1.333676462  | 3.727786411  | 0.476092661  |
| 28            | H      | -0.169611645 | 2.286300144  | 0.943258028  |
| 29            | C      | 2.597877094  | 3.947848315  | -0.111490584 |

|    |   |              |              |              |
|----|---|--------------|--------------|--------------|
| 30 | H | 4.248630764  | 3.070032838  | -1.169961732 |
| 31 | H | 0.782215813  | 4.542461188  | 0.927682982  |
| 32 | O | 3.732662440  | -4.805301448 | -0.096371117 |
| 33 | O | 3.210789166  | 5.134925491  | -0.181331032 |
| 34 | C | 5.065999133  | -4.948492224 | 0.412653324  |
| 35 | H | 5.101897597  | -4.724897527 | 1.484200163  |
| 36 | H | 5.330057511  | -5.991954425 | 0.247656124  |
| 37 | H | 5.763606664  | -4.301349989 | -0.129445236 |
| 38 | C | 2.570022162  | 6.300094655  | 0.355448252  |
| 39 | H | 2.404237391  | 6.194953856  | 1.432970582  |
| 40 | H | 3.259151473  | 7.122640839  | 0.170124542  |
| 41 | H | 1.619790413  | 6.494219836  | -0.153328317 |
| 42 | C | -2.868222892 | -2.795698674 | 0.188458202  |
| 43 | H | -2.354382819 | -2.972929400 | -0.763920906 |
| 44 | H | -2.096719860 | -2.711159968 | 0.959865886  |
| 45 | H | -3.479333803 | -3.673832742 | 0.405879408  |
| 46 | C | -3.249202264 | 2.273206309  | -0.180705361 |
| 47 | H | -2.722769280 | 2.517971626  | 0.749590305  |
| 48 | H | -2.510097315 | 2.305695501  | -0.987152344 |
| 49 | H | -3.991010800 | 3.053790907  | -0.360505570 |
| 50 | C | -7.400229178 | -0.585606245 | 0.035101010  |
| 51 | H | -7.874599064 | 0.302596903  | 0.460558253  |
| 52 | H | -7.762866621 | -0.687567525 | -0.995568739 |
| 53 | H | -7.741767425 | -1.463908655 | 0.588957027  |

### 3.4 Cartesian coordinates of optimized structures of 2<sup>+</sup>

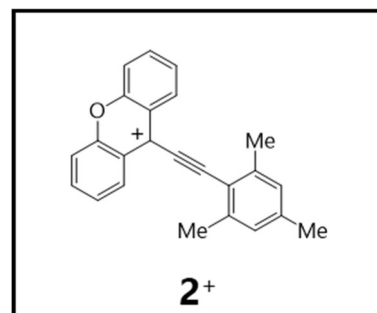

| center number | Symbol | x            | y            | z            |
|---------------|--------|--------------|--------------|--------------|
| 1             | C      | 4.737797233  | -1.210131582 | -0.008864216 |
| 2             | C      | 5.450892014  | 0.000272816  | -0.008401716 |
| 3             | C      | 4.737819882  | 1.210565857  | -0.008857053 |
| 4             | C      | 3.350558874  | 1.242553129  | -0.00475919  |
| 5             | C      | 2.646284689  | 0.000197291  | -0.002615769 |
| 6             | C      | 3.350636298  | -1.242190060 | -0.004747603 |
| 7             | C      | 1.247936322  | 0.000165165  | -0.001935787 |
| 8             | C      | 0.020052344  | 0.000131923  | -0.000939735 |
| 9             | C      | -1.366003254 | 0.000025031  | 0.000054949  |
| 10            | C      | -2.103925841 | 1.231886662  | 0.000609316  |
| 11            | C      | -1.487729616 | 2.509160767  | -0.000104594 |
| 12            | C      | -3.519668217 | 1.178888751  | 0.001842337  |
| 13            | C      | -2.252836356 | 3.655067249  | 0.000370714  |
| 14            | H      | -0.405156538 | 2.562147507  | -0.001161137 |
| 15            | C      | -4.299776401 | 2.339075049  | 0.00233269   |
| 16            | C      | -3.662947344 | 3.568272427  | 0.001593312  |
| 17            | H      | -1.774525222 | 4.628250647  | -0.000229485 |
| 18            | H      | -5.379592206 | 2.246712585  | 0.003261064  |
| 19            | C      | -2.103735168 | -1.231948973 | 0.00051176   |
| 20            | C      | -3.519488698 | -1.179154885 | 0.001877575  |
| 21            | C      | -1.487343952 | -2.509134133 | -0.000292091 |
| 22            | C      | -4.299417661 | -2.339472186 | 0.002534147  |
| 23            | C      | -2.252274497 | -3.655150663 | 0.000299085  |
| 24            | H      | -0.404764404 | -2.561949176 | -0.001491451 |
| 25            | C      | -3.662407710 | -3.568564814 | 0.001752496  |
| 26            | H      | -5.379248929 | -2.247275502 | 0.003614286  |
| 27            | H      | -1.773828148 | -4.628267555 | -0.000404147 |
| 28            | O      | -4.188241326 | -0.000194408 | 0.002595675  |
| 29            | H      | -4.257186157 | 4.476099022  | 0.001919023  |

|    |   |              |              |              |
|----|---|--------------|--------------|--------------|
| 30 | H | -4.256510155 | -4.476480903 | 0.002251374  |
| 31 | C | 2.602226899  | 2.549527815  | -0.005741683 |
| 32 | H | 1.959625534  | 2.633182170  | -0.889366993 |
| 33 | H | 1.960124813  | 2.634528688  | 0.878100995  |
| 34 | H | 3.289289520  | 3.397672355  | -0.006536492 |
| 35 | C | 2.602303149  | -2.549167498 | -0.005822356 |
| 36 | H | 1.960324562  | -2.634308328 | 0.878090263  |
| 37 | H | 1.959584909  | -2.632704794 | -0.889376656 |
| 38 | H | 3.289374077  | -3.397305614 | -0.00686525  |
| 39 | H | 5.288329023  | 2.146870538  | -0.013563212 |
| 40 | H | 5.288391211  | -2.146408767 | -0.013611568 |
| 41 | C | 6.954183664  | -0.000277382 | 0.022390508  |
| 42 | H | 7.367617413  | 0.893423555  | -0.451908881 |
| 43 | H | 7.308493709  | -0.013206909 | 1.060966157  |
| 44 | H | 7.366767713  | -0.883010780 | -0.472975866 |

#### 4. References

- [1] J. M. Frisch, W. G. Trucks, B. H. Schlegel, E. G. Scuseria, A. M. Robb, R. J. Cheeseman, G. Scalmani, V. Barone, A. G. Petersson, H. Nakatsuji, X. Li, M. Caricato, V. A. Marenich, J. Bloino, G. B. Janesko, R. Gomperts, B. Mennucci, P. H. Hratchian, V. J. Ortiz, F. A. Izmaylov, L. J. Sonnenberg, D. Williams-Young, F. Ding, F. Lipparini, F. Egidi, J. Goings, B. Peng, A. Petrone, T. Henderson, D. Ranasinghe, G. V. Zakrzewski, J. Gao, N. Rega, G. Zheng, W. Liang, M. Hada, M. Ehara, K. Toyota, R. Fukuda, J. Hasegawa, M. Ishida, T. Nakajima, Y. Honda, O. Kitao, H. Nakai, T. Vreven, K. Throssell, A. J. Montgomery, Jr., E. J. Peralta, F. Ogliaro, J. M. Bearpark, J. J. Heyd, N. E. Brothers, N. K. Kudin, N. V. Staroverov, A. T. Keith, R. Kobayashi, J. Normand, K. Raghavachari, P. A. Rendell, C. J. Burant, S. S. Iyengar, J. Tomasi, M. Cossi, M. J. Millam, M. Klene, C. Adamo, R. Cammi, W. J. Ochterski, L. R. Martin, K. Morokuma, O. Farkas, B. J. Foresman, J. D. Fox, **2019**, Gaussian, Inc., Wallingford CT.
- [2] C. M. Le, P. J. C. Menzies, D. A. Petrone, M. Lautens, *Angew. Chem. Int. Ed.* **2015**, *54*, 254-257.
- [3] O. V. Dolomanov, L. J. Bourhis, R. J. Gildea, J. A. K. Howard, H. Puschmann, *J. Appl. Crystallogr.* **2009**, *42*, 339–341.
- [4] G. M. Sheldrick, *Acta Crystallogr. Sect. A Found. Adv.* **2015**, *71*, 3–8.
- [5] G. M. Sheldrick, *Acta Crystallogr. Sect. C Struct. Chem.* **2015**, *71*, 3–8
